# Supplementary material for: Asthma related to cleaning agents: a clinical insight
Source: PubMed Central journal article supplement — BMJ Open. 2013 Sep 19;3(9):e003568. doi: 10.1136/bmjopen-2013-003568 (PMC3780339; doi:10.1136/bmjopen-2013-003568), 2013-09-19
Supplement: bmjopen-2013-003568.draft_revisions.pdf [file bmjopen-2013-003568.draft_revisions.pdf]

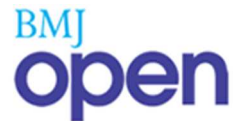

## ASTHMA RELATED TO CLEANING AGENTS: A CLINICAL INSIGHT

|                                 |                                                                                                                                                                                                                                                                                                                                                                                                                                                                                                                                                                                                                                                                                                                                                                                           |
|---------------------------------|-------------------------------------------------------------------------------------------------------------------------------------------------------------------------------------------------------------------------------------------------------------------------------------------------------------------------------------------------------------------------------------------------------------------------------------------------------------------------------------------------------------------------------------------------------------------------------------------------------------------------------------------------------------------------------------------------------------------------------------------------------------------------------------------|
| Journal:                        | <i>BMJ Open</i>                                                                                                                                                                                                                                                                                                                                                                                                                                                                                                                                                                                                                                                                                                                                                                           |
| Manuscript ID:                  | bmjopen-2013-003568                                                                                                                                                                                                                                                                                                                                                                                                                                                                                                                                                                                                                                                                                                                                                                       |
| Article Type:                   | Research                                                                                                                                                                                                                                                                                                                                                                                                                                                                                                                                                                                                                                                                                                                                                                                  |
| Date Submitted by the Author:   | 08-Jul-2013                                                                                                                                                                                                                                                                                                                                                                                                                                                                                                                                                                                                                                                                                                                                                                               |
| Complete List of Authors:       | Vandenplas, Olivier; Centre Hospitalier Universitaire de Mont-Godinne; Université Catholique de Louvain, Department of Chest Medicine<br>D'Alpaos, Vinciane; Centre Hospitalier Universitaire de Mont-Godinne; Université Catholique de Louvain, Department of Chest Medicine<br>Evrard, Geneviève; Centre Hospitalier Universitaire de Mont-Godinne; Université Catholique de Louvain, Department of Chest Medicine<br>JAMART, Jacques; CHU Mont-Godinne, Scientific Support<br>Thimpont, Joël; Fonds des Maladies Professionnelles, Medicine<br>Huaux, François; Université Catholique de Louvain, Industrial Toxicology and Occupational Medicine Unit<br>Renauld, Jean-Christophe; Ludwig Institute for Cancer Research, Université Catholique de Louvain, Experimental Medicine Unit |
| <b>Primary Subject Heading</b>: | Occupational and environmental medicine                                                                                                                                                                                                                                                                                                                                                                                                                                                                                                                                                                                                                                                                                                                                                   |
| Secondary Subject Heading:      | Respiratory medicine                                                                                                                                                                                                                                                                                                                                                                                                                                                                                                                                                                                                                                                                                                                                                                      |
| Keywords:                       | Asthma < THORACIC MEDICINE, Bronchoprovocation tests, Occupational disease, Cleaning                                                                                                                                                                                                                                                                                                                                                                                                                                                                                                                                                                                                                                                                                                      |
|                                 |                                                                                                                                                                                                                                                                                                                                                                                                                                                                                                                                                                                                                                                                                                                                                                                           |

SCHOLARONE™  
Manuscripts

1  
2  
3 1 **ASTHMA RELATED TO CLEANING AGENTS: A CLINICAL INSIGHT**  
4  
5 2

6  
7 3 Olivier Vandenplas,<sup>1,2</sup> Vinciane D'Alpaos,<sup>1</sup> Geneviève Evrard,<sup>1</sup> Jacques Jamart,<sup>3</sup>  
8

9 4 Joel Thimpont,<sup>2</sup> François Huaux,<sup>4</sup> Jean-Christophe Renauld,<sup>5</sup>  
10  
11 5

12  
13 6 **Running head:** Cleaners' asthma  
14

15 7 **Affiliations:**

16  
17 8 <sup>1</sup> Department of Chest Medicine, *Centre Hospitalier Universitaire de Mont-Godinne;*  
18  
19 9 *Université Catholique de Louvain, Yvoir, Belgium;*

20  
21 10 <sup>2</sup> *Fonds des Maladies Professionnelles, Brussels, Belgium;*  
22

23 11 <sup>3</sup> Scientific Support Unit, *Centre Hospitalier Universitaire de Mont-Godinne; Université*  
24  
25 12 *Catholique de Louvain, Yvoir, Belgium.*

26  
27 13 <sup>4</sup> Industrial Toxicology and Occupational Medicine Unit, *Université Catholique de Louvain,*  
28  
29 14 *Brussels; Belgium*

30  
31 15 <sup>5</sup> Ludwig Institute for Cancer Research, Experimental Medicine Unit, *Université Catholique de*  
32  
33 16 *Louvain, Brussels; Belgium*

34  
35 17 **Corresponding author:** Dr Olivier Vandenplas, Department of Chest Medicine, Centre  
36  
37 18 Hospitalier Universitaire de Mont-Godinne; B-5530 Yvoir, Belgium; Tel: +32-81 42 33 63; e-  
38  
39 19 mail: olivier.vandenplas@uclouvain.be

40  
41 20 **Keywords:** Asthma; bronchoprovocation tests; cleaning, quaternary ammonium compounds;  
42  
43 21 occupational disease.  
44

45  
46 22 **Word count body of manuscript:** 2,820 words  
47  
48  
49 23

1  
2  
3 **1 List of abbreviations**

4  
5 2 AHR: Non-specific airway hyperresponsiveness

6  
7 3 FEV<sub>1</sub>: Forced expiratory volume in one second

8  
9 4 OA: Occupational asthma

10  
11 5 PC<sub>20</sub>: Provocative concentration of histamine causing a 20% fall in FEV<sub>1</sub>

12  
13 6 PEF: Peak expiratory flow

14  
15 7 QAC: Quaternary ammonium compound

16  
17 8 SIC: Specific inhalation challenge

18  
19 9 WCB: Workers' Compensation Board

20  
21 10

22  
23 11

## ARTICLE SUMMARY

### Article focus

- There is accumulating evidence of an increased risk of asthma among cleaning workers, although the agents and mechanisms involved in the development of cleaning-related asthma remain largely uncertain.
- We undertook a retrospective case series analysis of all subjects who completed a specific inhalation challenge with cleaning/disinfecting materials over the period 1992-2011 in order to assess the pattern of bronchial responses induced by these agents and to evaluate the mechanisms involved in cleaning-related asthma.

### Key messages

- The asthmatic reactions induced by challenge exposures to cleaning agents were associated with a significant increase in post-challenge nonspecific airway hyperresponsiveness to histamine and/or an increase in sputum eosinophils
- This study based on specific inhalation challenges indicates that a substantial proportion of subjects who experience asthma symptoms related to cleaning materials may actually suffer from sensitizer-induced OA, predominantly caused by quaternary ammonium compounds.

### Strengths and limitations

- This is the first report describing the pattern of functional and sputum cell changes induced by cleaning/disinfecting materials. The findings provide further insight into the mechanisms of cleaning-related asthma and may have practical implications for the diagnosis and management of this condition.
- The major limitations of this study result from the lack of quantitative exposure assessment during the challenge tests and the selection of the studied population. The subjects described in this report may not accurately represent the whole population of workers with asthma related to cleaning activities; they may represent only a subset of

1  
2  
3 1 cleaning workers whom symptoms are severe enough for seeking specialized medical  
4  
5 2 advice and they did not include subjects with acute irritant-induced asthma.  
6  
7 3  
8  
9  
10  
11  
12  
13  
14  
15  
16  
17  
18  
19  
20  
21  
22  
23  
24  
25  
26  
27  
28  
29  
30  
31  
32  
33  
34  
35  
36  
37  
38  
39  
40  
41  
42  
43  
44  
45  
46  
47  
48  
49  
50  
51  
52  
53  
54  
55  
56  
57  
58  
59  
60

**ABSTRACT**

**Objective:** To determine the agents causing asthmatic reactions during specific inhalation challenges (SICs) in workers with cleaning-related asthma symptoms and to assess the pattern of bronchial responses in order to identify the mechanisms involved in cleaning-related asthma.

**Design:** A retrospective case series analysis.

**Setting:** The study included all subjects who completed a SIC procedure with the cleaning/disinfecting products suspected of causing work-related asthma over the period 1992-2011 in a tertiary centre, which is the single specialized centre of the French-speaking part of Belgium where all subjects with work-related asthma are referred for SIC.

**Results:** The review identified 44 subjects who completed an SIC with cleaning/disinfecting agents. Challenge exposure to the suspected cleaning agents elicited a  $\geq 20\%$  fall in FEV<sub>1</sub> in 17 (39%) subjects. The cleaning products that induced a positive SIC contained quaternary ammonium compounds (n=10), glutaraldehyde (n=3), both of these agents (n=1), and ethanolamines (n=2). Positive SICs were associated with a significant decrease in the median (interquartile range) value of the provocative concentration of histamine causing a 20% fall in FEV<sub>1</sub> (PC<sub>20</sub>) from 1.4 (0.2-4.2) mg/ml at baseline to 0.5 (0.4-3.0) mg/ml after the challenge and a significant increase in sputum eosinophils from 1.8 (0.8-7.2)% at baseline to 10.0 (4.1-15.9)% 7 hours after the challenge exposure while these parameters did not significantly change in subjects with a negative SIC. Overall, 11 of 17 subjects with positive SICs showed a >3-fold decrease in post-challenge histamine PC<sub>20</sub> value, a >2% increase in sputum eosinophils, or both of these outcomes.

**Conclusions:** These data indicate that a substantial proportion of workers who experience asthma symptoms related to cleaning materials show a pattern of bronchial reaction consistent with sensitizer-induced occupational asthma. The results also suggest that quaternary ammonium compounds are the principal cause of sensitizer-induced OA among cleaners.

**Abstract word count:** 294 words

## 1 INTRODUCTION

2 In recent years, there has been a growing concern about the potential role of exposure to  
3 cleaning products in the initiation and aggravation of asthma.[1, 2] Epidemiological surveys  
4 have consistently documented increased prevalence[3-5] and incidence[6-8] rates of asthma  
5 in workers exposed to cleaning materials and/or disinfectants, especially in domestic  
6 cleaners[3, 4] and healthcare workers[9-12]. In addition, some studies have reported an  
7 increased risk of work-related asthma symptoms in exposed workers.[5, 12, 13]

8 However, there is still limited knowledge on the specific exposures and pathophysiological  
9 mechanisms involved in cleaning-related asthma.[1, 2] Cleaning materials typically contain a  
10 wide variety of ingredients, some of which are respiratory irritants, such as chlorine-releasing  
11 agents and ammonia, while others are potential airway sensitizers.[14, 15] Asthma in  
12 cleaners has been mostly associated with the irritant effects of cleaning products, which may  
13 exacerbate asthma and, at high exposure levels, cause acute irritant-induced asthma (or  
14 "reactive airways dysfunction syndrome").[10, 16-19] Nevertheless, occasional case reports  
15 have described occupational asthma (OA) due to specific airway hypersensitivity to  
16 components of detergents or disinfectants,[2] Overall the determinants of cleaning-related-  
17 asthma symptoms remain largely uncertain since most available studies have relied on self-  
18 reported symptoms or physician-based diagnosis. Only two studies have investigated the  
19 effects of cleaning exposures on peak expiratory flow (PEF) variability with inconsistent  
20 results.[20, 21]

21 Therefore, the data of subjects who completed specific inhalation challenges (SICs) with the  
22 cleaning agents and/or disinfectants suspected of causing their work-related asthma  
23 symptoms were reviewed in order: 1) to determine the prevalence and causes of asthmatic  
24 reactions induced by these agents; and 2) to compare the clinical features as well as the  
25 changes in nonspecific airway hyperresponsiveness (AHR) and sputum cell counts in  
26 subjects with positive or negative responses to SIC.





1 The tested cleaning materials and the mode of exposure during SIC were selected based on  
2 the subjects' interview, the Material Safety Data Sheets, and, most often, an analysis of the  
3 job exposure by WCB's hygienists. The cleaning agents were diluted in cold or heated water,  
4 brushed on a cardboard and/or sprayed according to the collected information.

5 The duration of exposure to the cleaning products was gradually increased (i.e. 1 min, 4 min,  
6 10 min, 15 min, 30 min, and 60 min) until a  $\geq 20\%$  fall in FEV<sub>1</sub> occurred or a cumulative  
7 exposure of two hours was completed. Spirometry was obtained at baseline and serially after  
8 exposure for a total of at least six hours. A SIC was considered positive when a sustained  
9  $\geq 20\%$  fall in FEV<sub>1</sub> was recorded. The level of AHR to histamine was determined at the end of  
10 the control day (i.e. baseline value), seven hours after the end of each active challenge when  
11 the FEV<sub>1</sub> was within 10% of baseline value, and 24 hours after the last active challenge.[25]  
12 AHR was expressed as the provocative concentration of histamine causing a 20% fall in  
13 FEV<sub>1</sub> (PC<sub>20</sub>).[22] Since March 2006, sputum cell counts were assessed at the end of the  
14 control day and seven hours after the end of active challenges (i.e. after the assessment of  
15 AHR and administration of an inhaled bronchodilator). Sputum was induced through the  
16 inhalation of increasing concentrations (3%, 4%, and 5%) of hypertonic saline and processed  
17 as previously described.[26]

18 Those subjects who did not demonstrate a  $\geq 20\%$  fall in FEV<sub>1</sub> during the first active test day  
19 underwent a repeated challenge for a maximum of 2-3 hours on the next day. Further  
20 challenges were proposed when there was a  $>3$ -fold decrease in the post-challenge PC<sub>20</sub>  
21 value or a  $>3\%$  increase in sputum eosinophils as compared to the control day.[25, 26]

## 22 **Data analysis**

23 The following information was collected from the medical charts: 1) demographic, clinical,  
24 and occupational characteristics of the subjects; and 2) baseline functional data, histamine  
25 PC<sub>20</sub> value on the control day and after the last active challenge, as well as the  
26 corresponding sputum cell counts when available. Changes in AHR were considered

1  
2  
3 1 significant when there was a >3-fold decrease in post-challenge histamine PC<sub>20</sub> compared to  
4  
5 2 baseline value.[25] An increase in sputum eosinophils of more than two percentage points  
6  
7 3 compared with the control day value was regarded as clinically relevant.[25, 27]  
8  
9

10 4 Quantitative data are presented as median and 25<sup>th</sup> and 75<sup>th</sup> interquartile range.  
11  
12 5 Comparisons between subgroups of subjects were made using the chi-squared test, Fisher  
13  
14 6 exact test, or Wilcoxon rank-sum test as appropriate. The Wilcoxon signed-rank test was  
15  
16 7 used for comparing variables before and after SIC in the same subjects. All statistical tests  
17  
18 8 were two-tailed; a p-value <0.05 was considered significant. Statistical analysis was  
19  
20 9 performed using the IBM SPSS Statistics 19.0 software (SPSS Inc, Chicago, Ill).  
21  
22  
23  
24  
25  
26  
27  
28  
29  
30  
31  
32  
33  
34  
35  
36  
37  
38  
39  
40  
41  
42  
43  
44  
45  
46  
47  
48  
49  
50  
51  
52  
53  
54  
55  
56  
57  
58  
59  
60

## 1 RESULTS

### 2 Baseline characteristics

3 During the reviewed period, 44 of 713 (6%) subjects were challenged with cleaning agents  
4 and/or disinfectants. The main demographic, occupational, and clinical characteristics of the  
5 subjects are presented in Table 1. A  $\geq 20\%$  decrease in FEV<sub>1</sub> was recorded during SIC in 17  
6 (39%) of the subjects, 24% showing an isolated immediate reaction, 18% an isolated late  
7 reaction, 29% dual reactions, and 30% atypical reactions. The median (interquartile range)  
8 duration of exposure to cleaning agents that elicited an asthmatic reaction was 120 (32-150)  
9 minutes. The cleaning products that induced a positive FEV<sub>1</sub> response contained quaternary  
10 ammonium compounds (QAC) (mainly, benzalkonium and didecyldimethylammonium  
11 chlorides) in 10 (59%) subjects, glutaraldehyde in three instances, both agents in one  
12 instance, and ethanolamines in two subjects (Table 1). No known sensitizing agent was  
13 identified in one subject.

14 The subjects who developed an asthmatic response to cleaning agents and/or disinfectants  
15 did not differ from those who did not for most of the demographic and clinical characteristics.  
16 The pattern of the work-related respiratory symptoms was similar in both groups (Table 1),  
17 although wheezing at work was slightly more frequently reported by subjects with a positive  
18 SIC (82% vs. 52%,  $p=0.056$ ). The subjects with a positive SIC tended to experience a lower  
19 level of asthma control. The proportion of these subjects who required the use of an inhaled  
20 short-acting beta<sub>2</sub>-agonist at least once a day was significantly higher (41%) as compared to  
21 those with a negative SIC (4%;  $p=0.002$ ), although the daily dose of inhaled corticosteroids  
22 were similar in both groups. In addition, baseline spirometry revealed more often significant  
23 airway obstruction in subjects who showed a positive SIC (29%) than in those who did not  
24 (4%,  $p=0.016$ ).

### 25 Non-specific airway hyperresponsiveness

1  
2  
3 1 At baseline, the subjects with a positive SIC to cleaning products showed a significantly  
4  
5 2 lower median histamine PC<sub>20</sub> value than those with a negative SIC (p=0.004) (Table 2). A  
6  
7 3 post-challenge histamine PC<sub>20</sub> value was available in 12 of the 17 subjects who showed a  
8  
9 4 positive SIC and in 25 of 27 subjects with a negative SIC. The post-challenge PC<sub>20</sub> value  
10  
11 5 was not measured because the FEV<sub>1</sub> 24 hours after the end of exposure was still ≥20%  
12  
13 6 lower than the pre-challenge value in four subjects with a positive SIC or because the  
14  
15 7 subjects refused to complete the test in the other instances. Positive SICs were associated  
16  
17 8 with a significant decrease in the median post-challenge PC<sub>20</sub> value, whereas no change was  
18  
19 9 documented in subjects with a negative SIC. Five of the 12 (42%) subjects with a positive  
20  
21 10 SIC demonstrated a >3-fold decrease in post-challenge PC<sub>20</sub> value, while none of those with  
22  
23 11 a negative SIC did so.

## 26 12 **Sputum cell counts**

29 13 Among the subjects who were investigated from 2006 onwards, a suitable sputum sample  
30  
31 14 was obtained seven hours after the end of the last active challenge in 13 of 15 positive SICs  
32  
33 15 and in seven of 11 negative SICs (Table 2). At baseline, the subjects with a positive SIC  
34  
35 16 showed a slightly higher sputum eosinophil percentage than those with a negative SIC  
36  
37 17 (p=0.046). Positive SICs were associated with a significant post-challenge increase in  
38  
39 18 sputum eosinophils, while eosinophil counts did not significantly change in negative SICs.  
40  
41 19 Eight (62%) of the 13 subjects with a positive SIC showed a >2% increase in post-challenge  
42  
43 20 eosinophils, while none of the subjects with a negative SIC did so. In subjects with a positive  
44  
45 21 SIC, there was an increase in the absolute number of sputum neutrophils after the last active  
46  
47 22 challenge while the percentage of neutrophils was not significantly different at baseline and  
48  
49 23 on the last challenge day.

52 24 Overall, positive SICs were associated with either a >3-fold decrease in post-challenge PC<sub>20</sub>  
53  
54 25 value in three subjects, a >2% increase in sputum eosinophils in six subjects, or both of  
55  
56 26 these outcomes in two subjects.

## 1 DISCUSSION

2 This study showed that challenge exposure to the cleaning agents and/or disinfectants used  
3 at work induced an asthmatic reaction in 39% of the subjects who experienced asthma  
4 symptoms upon exposure to these products. In addition, the results of the SICs provided  
5 evidence supporting a specific hypersensitivity mechanism rather than a nonspecific  
6 bronchoconstriction due to an irritant effect. Indeed, eleven (65%) of the 17 positive SICs  
7 induced by cleaning agents were associated with a significant increase in post-challenge  
8 AHR, an increase in sputum eosinophils, or both of these outcomes. Noticeably, among the  
9 subjects who developed a positive bronchial response to QACs, a post-challenge increase in  
10 sputum eosinophils and/or in the level of AHR was documented in nine of ten instances.

11 To the best of our knowledge, this is the first study reporting the changes in lung function  
12 parameters and markers of airway inflammation in subjects challenged with the cleaning  
13 materials suspected of causing work-related asthma symptoms. Available evidence indicates  
14 that cleaning materials can both exacerbate asthma (i.e. work-exacerbated asthma) and  
15 induce the development of asthma (i.e. occupational asthma) through either immunological  
16 or irritant mechanisms.[12, 16, 19, 28] Median-Ramon et al. investigated the daily changes in  
17 peak expiratory flow (PEF) in 43 female domestic cleaners with a recent history of asthma  
18 and/or chronic bronchitis.[20] There was no significant association between the changes in  
19 PEF and cleaning exposures, with the exception of a decrease in PEF at night that was  
20 related to the use of ammonia. Nevertheless, analysis of PEF data using the Occupational  
21 Asthma System (OASYS) program identified a work-related pattern in 30% of the subjects,  
22 but the specific exposures associated with these changes were not described. By contrast,  
23 Bernstein et al. reported an increase in lower respiratory tract symptoms during cleaning  
24 activities in asthmatic homemakers compared with non-asthmatics in the absence of  
25 significant changes in PEF.[21] Our findings in subjects with a positive SIC are consistent  
26 with previous studies which reported that an increase in AHR and sputum eosinophils occurs  
27 specifically – though inconstantly – in sensitized individuals who develop asthmatic reactions

1 induced by common inhalant allergens as well as high-molecular-weight and low-molecular-  
2 weight occupational agents.[29] Only one subject developed a  $\geq 20\%$  fall in FEV<sub>1</sub> on  
3 exposure to a degreasing spray that apparently did not contain a known sensitizing agent.  
4 This subject who reported pre-existing asthma, also failed to demonstrate a post-challenge  
5 increase in AHR or sputum eosinophils, suggesting that the bronchial response resulted from  
6 an irritant effect consistent with the concept of “work-exacerbated asthma”. [30]

7 Noticeably, 13 subjects with a negative SIC showed AHR to histamine neither at baseline nor  
8 after challenge exposure to the cleaning agents (Table 2), although nine of them were  
9 treated with an inhaled corticosteroid. These findings are consistent with those reported by  
10 Chiry et al. who found that a high proportion (57%) of subjects referred to tertiary centres for  
11 work-related asthma symptoms failed to demonstrate any functional evidence of asthma,  
12 although they experienced respiratory symptoms that were similar to those diagnosed as  
13 having OA or work-exacerbated asthma, except for a lower prevalence of wheezing.[31] A  
14 recent population-based questionnaire survey of health care workers exposed to cleaning  
15 materials also found that a high proportion (64%) of the subjects who experienced work-  
16 related asthma symptoms had not been given a diagnosis of asthma.[12]

17 There is little information on the specific agents involved in the various phenotypes of asthma  
18 related to cleaning exposure. Most epidemiological studies have linked asthma with  
19 exposure to irritant cleaning materials, mainly bleach,[9, 11, 12, 17, 28] ammonia,[9, 11, 12,  
20 20, 28] and cleaning/degreasing sprays.[9, 11, 12, 20] On the other hand, occasional case  
21 reports have described OA presumably due to specific sensitization to disinfectants, such as  
22 chloramine-T, glutaraldehyde, QACs, and isothiazolinone, surfactants, ethanolamines used  
23 in wax-removing compounds, and detergent enzymes.[1, 2] Among the cases of asthma  
24 related to cleaning products identified by the US Sentinel Event Notification Systems for  
25 Occupational Risks (SENSOR), 62% were considered as “OA with a latency period”, but only  
26 14% of these cases were related to an identified respiratory sensitizer.[16] A recent Finnish  
27 report described 20 cases of OA diagnosed in professional cleaning workers using SIC

1 during the period 1994-2004.[32] The majority (70%) of these cases were caused by moulds  
2 and non-cleaning chemicals (e.g. isocyanates) that were present at the workplace, whereas  
3 only six cases of OA were attributed to cleaning agents, including ethanolamines and  
4 chloramine-T. Our study focusing on the role of cleaning products and/or disinfectants  
5 indicates that QACs are the most frequent agent causing OA in workers exposed to such  
6 materials in various occupations. Very few cases of OA due to QACs have been reported in  
7 the literature,[33, 34] although these compounds are widely used in cleaning products.[14,  
8 15] QACs are non-volatile, but it is likely that inhalation exposure may occur during spray  
9 application of the products.[14, 15] The immunological mechanisms involved in the  
10 development of specific airway hypersensitivity to QACs is unknown as it is the case for most  
11 low-molecular-weight occupational agents.[29]

12 The major limitation of this study results from the lack of quantitative exposure assessment  
13 during the SICs. The agents that induced the observed asthmatic reactions could not be  
14 formally identified since the subjects were challenged with the commercial products they  
15 used at work, which most often contained a mixture of various potentially sensitizing and  
16 irritant compounds. The causal agents could only be inferred from their known asthmagenic  
17 potential. The asthma hazard index of QACs (0.81 to 0.95), glutaraldehyde (0.82), and  
18 ethanolamines (0.64 to 0.86) derived from a quantitative structure activity relationship model  
19 is above the cut-off value of 0.5, which predicts the potential for inducing OA with a sensitivity  
20 of 86% and a specificity of 99% (Seed MJ, personal communication;  
21 <http://www.coeh.man.ac.uk/research/asthma/>; last accessed 28 January 2012) [35].

22 The subjects described in this report may not accurately represent the whole population of  
23 workers with asthma related to cleaning activities. The data were derived from the single  
24 specialized centre of the French-speaking part of Belgium (~1.7 million active workers) where  
25 all SICs were performed during the period from 1992 to 2011. Nevertheless, the subjects  
26 evaluated in this study may represent only a subset of cleaning workers whom symptoms are  
27 severe enough for seeking specialized medical advice or claim compensation. It is also likely

1  
2  
3 1 that domestic cleaners were largely underrepresented in our series since most private home  
4  
5 2 cleaners are employed in the informal sector and are not eligible for compensation. In  
6  
7 3 addition, the study focused on individuals who experienced asthma symptoms that were  
8  
9 4 directly related to cleaning products and/or disinfectants; those with symptoms related to  
10  
11 5 workplace agents other than cleaning products were not included in this study.

## 12 13 14 6 **CONCLUSION**

15  
16  
17 7 This study based on SICs indicates that a substantial proportion of subjects who experience  
18  
19 8 asthma symptoms related to cleaning materials actually suffer from sensitizer-induced OA,  
20  
21 9 predominantly caused by QACs. The findings of this study may help to improve the  
22  
23 10 diagnosis, management and prevention of cleaning-related asthma, although further  
24  
25 11 investigation is required to identify the underlying pathophysiological mechanisms.

26  
27  
28 12

29  
30  
31 13  
32  
33  
34  
35  
36  
37  
38  
39  
40  
41  
42  
43  
44  
45  
46  
47  
48  
49  
50  
51  
52  
53  
54  
55  
56  
57  
58  
59  
60



1  
2  
3 **Acknowledgements:**  
4

5  
6 The authors are grateful to Maria Roccaro-Luczak, Michael Duchene, and Stéphane  
7  
8 François from the *Fonds des Maladies Professionnelles*, Brussels, Belgium who performed  
9  
10 most of the job exposure assessments. They also thank James Hatch for reviewing the  
11  
12 manuscript.  
13

14  
15 **Contributorship statement:**  
16

17  
18 OV, JT, JCR, and FH: Conception of the study, interpretation of data, and reviewing of the  
19  
20 manuscript; VD, GE, and JJ: Data collection, analysis of data, and reviewing of the  
21  
22 manuscript. OV supervised specific inhalation challenges, drafted the initial version of the  
23  
24 manuscript, and acts as guarantor of the final content of the manuscript.  
25

26  
27 **Data sharing statement:**  
28

29  
30 Extra data is available by emailing [olivier.vandenplas@uclouvain.be](mailto:olivier.vandenplas@uclouvain.be)  
31  
32

33 **Funding:**  
34

35  
36 This work was supported by a grant from the *Actions de Recherche Concertées de la*  
37  
38 *Communauté Française de Belgique*.  
39

40  
41 **Competing interests:** None to declare.  
42  
43  
44  
45  
46  
47  
48  
49  
50  
51  
52  
53  
54  
55  
56  
57  
58  
59  
60

Table 1. Demographic, occupational, and clinical characteristics of the subjects

|                                                      | Positive SIC<br>(n=17) | Negative SIC<br>(n=27) | p-value |
|------------------------------------------------------|------------------------|------------------------|---------|
| Gender (female)                                      | 13 (76)                | 23 (85)                | 0.466   |
| Age, yr*                                             | 47 (39-49)             | 47 (35-53)             | 0.942   |
| Referral by WCB                                      | 13 (76)                | 20 (74)                | 0.858   |
| Job/industry :                                       |                        |                        |         |
| Professional cleaners:                               | 9                      | 15                     |         |
| Healthcare facilities                                | 2                      | 5                      |         |
| Various industries                                   | 3                      | 4                      |         |
| Private houses                                       | 1                      | 3                      |         |
| Public buildings                                     | 2                      | 2                      |         |
| Kitchens                                             | 1                      | 1                      |         |
| Healthcare workers                                   | 7                      | 9                      |         |
| Food workers                                         | 1                      | 2                      |         |
| Pharmaceutical workers                               | 0                      | 1                      |         |
| Exposure to respiratory sensitizers:                 | 16 (94)                | 16 (59)                | 0.033   |
| QAC                                                  | 10                     | 6                      |         |
| QAC and glutaraldehyde                               | 1                      | 3                      |         |
| Glutaraldehyde                                       | 3                      | 7                      |         |
| Ethanalamines                                        | 2                      | 0                      |         |
| No identified sensitizer                             | 1                      | 11                     |         |
| Current and ex-smokers                               | 6 (35)                 | 8 (30)                 | 0.694   |
| Atopy †                                              | 7 (41)                 | 13 (48)                | 0.651   |
| Asthma pre-existing to exposure                      | 2 (12)                 | 2 (7)                  | 0.624   |
| Duration of exposure before onset of asthma, mo*     | 12 (5-153)             | 53 (31-165)            | 0.114   |
| Duration of asthma before SIC, mo*                   | 25 (7-59)              | 25 (10-55)             | 0.980   |
| Delay since last work exposure, mo*                  | 10 (0.3-16)            | 8 (0.1-24)             | 0.808   |
| Work-related respiratory symptoms:                   |                        |                        |         |
| Wheezing                                             | 14 (82)                | 14 (52)                | 0.056   |
| Breathlessness                                       | 14 (82)                | 20 (74)                | 0.716   |
| Cough                                                | 11 (65)                | 21 (78)                | 0.343   |
| Chest tightness                                      | 11 (65)                | 18 (67)                | 0.893   |
| Sputum                                               | 4 (24)                 | 8 (30)                 | 0.740   |
| Work-related rhinitis                                | 8 (47)                 | 16 (59)                | 0.429   |
| Work-related dermatitis:                             | 5 (29)                 | 5 (19)                 | 0.401   |
| Inhaled corticosteroid:                              |                        |                        | 0.160   |
| No. with Inhaled corticosteroid                      | 13 (76)                | 15 (56)                | 0.129   |
| Low dose ‡                                           | 3 (18)                 | 5 (19)                 |         |
| Medium dose ‡                                        | 5 (29)                 | 5 (19)                 | 0.494   |
| High dose ‡                                          | 5 (29)                 | 5 (19)                 |         |
| Short-acting beta <sub>2</sub> -agonist ≥ once a day | 7 (41)                 | 1 (4)                  | 0.002   |
| Baseline FEV <sub>1</sub> , % predicted*             | 92 (73-101)            | 100 (88-109)           | 0.049   |
| Baseline FEV <sub>1</sub> /FVC, %*                   | 71 (63-77)             | 80 (73-83)             | 0.002   |
| Baseline airway obstruction ¥                        | 5 (29)                 | 1 (4)                  | 0.016   |

Legend: Data are presented as n (% of available data) unless otherwise specified. FEV<sub>1</sub>: forced expiratory volume in one-second; FVC: forced vital capacity; PC<sub>20</sub>: provocative concentration of histamine causing a 20% fall in FEV<sub>1</sub>; QAC: quaternary ammonium compound; SIC: specific inhalation challenge; WCB: workers' compensation board.

\*: Median value with 25<sup>th</sup>-75<sup>th</sup> interquartile range in parentheses;

†: Atopy defined by a positive skin-prick test to at least one common inhalant allergen;

1 ‡: Low dose: equal or less than 500 µg beclomethasone dipropionate equivalent per day; medium  
2 dose: more than 500 µg but equal or less than 1000 µg per day; and high dose: more than 1000 µg  
3 per day.  
4 †: Airway obstruction defined by an FEV<sub>1</sub> <80% predicted value and an FEV<sub>1</sub>/FVC ratio <70%.

5  
6  
7  
8  
9

10  
11  
12  
13  
14  
15  
16  
17  
18  
19  
20  
21  
22  
23  
24  
25  
26  
27  
28  
29  
30  
31  
32  
33  
34  
35  
36  
37  
38  
39  
40  
41  
42  
43  
44  
45  
46  
47  
48  
49  
50  
51  
52  
53  
54  
55  
56  
57  
58  
59  
60

For peer review only

1  
2  
3  
4  
5  
6  
7  
8  
9  
10  
11  
12  
13  
14  
15  
16  
17  
18  
19  
20  
21  
22  
23  
24  
25  
26  
27  
28  
29  
30  
31  
32  
33  
34  
35  
36  
37  
38  
39  
40  
41  
42  
43  
44  
45  
46  
47  
48  
49  
50  
51  
52  
53  
54  
55  
56  
57  
58  
59  
60

1  
2  
3

**Table 2. Changes in non-specific airway responsiveness and sputum cells during inhalation challenges with cleaning agents**

|                                        | Positive SIC     |                  |         | Negative SIC     |                   |         |
|----------------------------------------|------------------|------------------|---------|------------------|-------------------|---------|
|                                        | Baseline         | Post-challenge   | p-value | Baseline         | Post-challenge    | p-value |
| AHR to histamine:                      | (n=17)           | (n=12)           |         | (n=27)           | (n=25)            |         |
| PC <sub>20</sub> , mg/ml               | 1.4 (0.2-4.22)   | 0.5 (0.4-3.0)†   | 0.019   | 13.0 (1.4-32.0)  | 16.9 (2.6-32.0)   | 0.267   |
| PC <sub>20</sub> >16 mg/ml*            | 2 (12)           | 0                |         | 13 (48)          | 13 (52)           |         |
| >3-fold decrease in PC <sub>20</sub> * |                  | 5 (42)           |         |                  | 0                 |         |
| Sputum cell counts:‡                   | (n=13)           | (n=13)           |         | (n=7)            | (n=7)             |         |
| Total cell count, 10 <sup>6</sup> /ml  | 0.54 (0.34-0.97) | 1.15 (0.53-2.17) | 0.041   | 0.34 (0.26-1.89) | 0.65 (0.38-1.81)  | 0.735   |
| Eosinophils, 10 <sup>6</sup> cells/ml  | 0.02 (0.01-0.04) | 0.12 (0.02-0.39) | 0.006   | 0 (0-0.01)       | 0.01 (0.01-0.010) | 0.345   |
| Eosinophils, %                         | 1.8 (0.8-7.2)    | 10.0 (4.1-15.9)  | 0.009   | 0.2 (0-2.5)      | 0.8 (0.2-1.5)     | 0.786   |
| Increase in eosinophils >2%*           |                  | 8 (62)           |         |                  | 0                 |         |
| Neutrophils, 10 <sup>6</sup> cells/ml  | 0.40 (0.17-0.70) | 0.71 (0.38-1.62) | 0.009   | 0.19 (0.16-1.70) | 0.34 (0.25-1.52)  | 0.866   |
| Neutrophils, %                         | 57.3 (42.4-72.5) | 69.5 (56.9-83.0) | 0.152   | 60.3 (55.7-83.0) | 70.3 (52.5-84.0)  | 0.866   |

4 Legend: Data are presented as median value with 25<sup>th</sup>-75<sup>th</sup> interquartile range in parentheses unless  
5 otherwise specified. AHR: airway hyperresponsiveness; PC<sub>20</sub>: provocative concentration of histamine  
6 causing a 20% fall in FEV<sub>1</sub>; SIC: specific inhalation challenge.

7 \*: Data expressed as n (% of available data);

8 †: Histamine PC<sub>20</sub> was measured at seven hours after the end of exposure in six subjects and 24  
9 hours post-exposure in six subjects with positive SIC;

10 ‡: Data available in subjects who performed an SIC from 2006 onwards.  
11  
12

**REFERENCES**

1. Zock JP, Vizcaya D, Le Moual N. Update on asthma and cleaners. *Curr Opin Allergy Clin Immunol* 2010;10:114-20.
2. Quirce S, Barranco P. Cleaning agents and asthma. *J Investig Allergol Clin Immunol* 2010;20:542-50; quiz 2p following 50.
3. Zock JP, Kogevinas M, Sunyer J, et al. Asthma risk, cleaning activities and use of specific cleaning products among Spanish indoor cleaners. *Scand J Work Environ Health* 2001;27:76-81.
4. Medina-Ramon M, Zock JP, Kogevinas M, et al. Asthma symptoms in women employed in domestic cleaning: a community based study. *Thorax* 2003;58:950-4.
5. Arif AA, Delclos GL, Whitehead LW, et al. Occupational exposures associated with work-related asthma and work-related wheezing among U.S. workers. *Am J Ind Med* 2003;44:368-76.
6. Karjalainen A, Martikainen R, Karjalainen J, et al. Excess incidence of asthma among Finnish cleaners employed in different industries. *Eur Respir J* 2002;19:90-5.
7. Kogevinas M, Zock JP, Jarvis D, et al. Exposure to substances in the workplace and new-onset asthma: an international prospective population-based study (ECRHS-II). *Lancet* 2007;370:336-41.
8. Ghosh RE, Cullinan P, Fishwick D, et al. Asthma and occupation in the 1958 birth cohort. *Thorax* 2013;68:365-71.
9. Mirabelli MC, Zock JP, Plana E, et al. Occupational risk factors for asthma among nurses and related healthcare professionals in an international study. *Occup Environ Med* 2007;64:474-9.
10. Delclos GL, Gimeno D, Arif AA, et al. Occupational risk factors and asthma among health care professionals. *Am J Respir Crit Care Med* 2007;175:667-75.
11. Vizcaya D, Mirabelli MC, Anto JM, et al. A workforce-based study of occupational exposures and asthma symptoms in cleaning workers. *Occup Environ Med* 2011;68:914-9.

- 1  
2  
3 1 12. Arif AA, Delclos GL. Association between cleaning-related chemicals and work-related  
4  
5 2 asthma and asthma symptoms among healthcare professionals. *Occup Environ Med*  
6  
7 3 2012;69:35-40.  
8  
9 4 13. Obadia M, Liss GM, Lou W, et al. Relationships between asthma and work exposures  
10  
11 5 among non-domestic cleaners in Ontario. *Am J Ind Med* 2009;52:716-23.  
12  
13 6 14. Wolkoff P, Schneider T, Kildeso J, et al. Risk in cleaning: chemical and physical  
14  
15 7 exposure. *Sci Total Environ* 1998;215:135-56.  
16  
17 8 15. Bello A, Quinn MM, Perry MJ, et al. Characterization of occupational exposures to  
18  
19 9 cleaning products used for common cleaning tasks--a pilot study of hospital cleaners.  
20  
21 10 *Environ Health* 2009;8:11.  
22  
23 11 16. Rosenman KD, Reilly MJ, Schill DP, et al. Cleaning products and work-related asthma. *J*  
24  
25 12 *Occup Environ Med* 2003;45:556-63.  
26  
27 13 17. Medina-Ramon M, Zock JP, Kogevinas M, et al. Asthma, chronic bronchitis, and  
28  
29 14 exposure to irritant agents in occupational domestic cleaning: a nested case-control  
30  
31 15 study. *Occup Environ Med* 2005;62:598-606.  
32  
33 16 18. Orriols R, Costa R, Albanell M, et al. Reported occupational respiratory diseases in  
34  
35 17 Catalonia. *Occup Environ Med* 2006;63:255-60.  
36  
37 18 19. Vizcaya D, Mirabelli MC, Orriols R, et al. Functional and biological characteristics of  
38  
39 19 asthma in cleaning workers. *Respir Med* 2013;107:673-83.  
40  
41 20 20. Medina-Ramon M, Zock JP, Kogevinas M, et al. Short-term respiratory effects of  
42  
43 21 cleaning exposures in female domestic cleaners. *Eur Respir J* 2006;27:1196-203.  
44  
45 22 21. Bernstein JA, Brandt D, Rezvani M, et al. Evaluation of cleaning activities on respiratory  
46  
47 23 symptoms in asthmatic female homemakers. *Ann Allergy Asthma Immunol* 2009;102:41-  
48  
49 24 6.  
50  
51 25 22. Sterk PJ, Fabbri LM, Quanjer PH, et al. Airway responsiveness. Standardized challenge  
52  
53 26 testing with pharmacological, physical and sensitizing stimuli in adults. Report Working  
54  
55 27 Party Standardization of Lung Function Tests, European Community for Steel and Coal.

- 1  
2  
3 1 Official Statement of the European Respiratory Society. *Eur Respir J Suppl* 1993;16:53-  
4  
5 2 83.  
6  
7 3 23. Vandenasplas O, Malo JL. Inhalation challenges with agents causing occupational asthma.  
8  
9 4 *Eur Respir J* 1997;10:2612-29.  
10  
11 5 24. Pepys J, Hutchcroft BJ. Bronchial provocation tests in etiologic diagnosis and analysis of  
12  
13 6 asthma. *Am Rev Respir Dis* 1975;112:829-59.  
14  
15 7 25. Vandenasplas O, Delwiche JP, Jamart J, et al. Increase in non-specific bronchial  
16  
17 8 hyperresponsiveness as an early marker of bronchial response to occupational agents  
18  
19 9 during specific inhalation challenges. *Thorax* 1996;51:472-8.  
20  
21 10 26. Vandenasplas O, D'Alpaos V, Heymans J, et al. Sputum eosinophilia: an early marker of  
22  
23 11 bronchial response to occupational agents. *Allergy* 2009;64:754-61.  
24  
25 12 27. Girard F, Chaboillez S, Cartier A, et al. An effective strategy for diagnosing occupational  
26  
27 13 asthma: use of induced sputum. *Am J Respir Crit Care Med* 2004;170:845-50.  
28  
29 14 28. de Fatima Macaira E, Algranti E, Medina Coeli Mendonca E, et al. Rhinitis and asthma  
30  
31 15 symptoms in non-domestic cleaners from the Sao Paulo metropolitan area, Brazil.  
32  
33 16 *Occup Environ Med* 2007;64:446-53.  
34  
35 17 29. Maestrelli P, Boschetto P, Fabbri LM, et al. Mechanisms of occupational asthma. *J*  
36  
37 18 *Allergy Clin Immunol* 2009;123:531-42; quiz 43-4.  
38  
39 19 30. Nicholson PJ, Cullinan P, Taylor AJ, et al. Evidence based guidelines for the prevention,  
40  
41 20 identification, and management of occupational asthma. *Occup Environ Med*  
42  
43 21 2005;62:290-9.  
44  
45 22 31. Chiry S, Boulet LP, Lepage J, et al. Frequency of work-related respiratory symptoms in  
46  
47 23 workers without asthma. *Am J Ind Med* 2009;52:447-54.  
48  
49 24 32. Makela R, Kauppi P, Suuronen K, et al. Occupational asthma in professional cleaning  
50  
51 25 work: a clinical study. *Occup Med (Lond)* 2011;61:121-6.  
52  
53 26 33. Burge PS, Richardson MN. Occupational asthma due to indirect exposure to lauryl  
54  
55 27 dimethyl benzyl ammonium chloride used in a floor cleaner. *Thorax* 1994;49:842-3.  
56  
57  
58  
59  
60

- 1  
2  
3 1 34. Purohit A, Kopferschmitt-Kubler MC, Moreau C, et al. Quaternary ammonium  
4  
5 2 compounds and occupational asthma. *Int Arch Occup Environ Health* 2000;73:423-7.  
6  
7 3 35. Seed M, Agius R. Further validation of computer-based prediction of chemical asthma  
8  
9 4 hazard. *Occup Med (Lond)* 2010;60:115-20.  
10  
11 5  
12  
13 6  
14  
15  
16  
17  
18  
19  
20  
21  
22  
23  
24  
25  
26  
27  
28  
29  
30  
31  
32  
33  
34  
35  
36  
37  
38  
39  
40  
41  
42  
43  
44  
45  
46  
47  
48  
49  
50  
51  
52  
53  
54  
55  
56  
57  
58  
59  
60

For peer review only





## ASTHMA RELATED TO CLEANING AGENTS: A CLINICAL INSIGHT

|                                 |                                                                                                                                                                                                                                                                                                                                                                                                                                                                                                                                                                                                                                                                                                                                                                                           |
|---------------------------------|-------------------------------------------------------------------------------------------------------------------------------------------------------------------------------------------------------------------------------------------------------------------------------------------------------------------------------------------------------------------------------------------------------------------------------------------------------------------------------------------------------------------------------------------------------------------------------------------------------------------------------------------------------------------------------------------------------------------------------------------------------------------------------------------|
| Journal:                        | <i>BMJ Open</i>                                                                                                                                                                                                                                                                                                                                                                                                                                                                                                                                                                                                                                                                                                                                                                           |
| Manuscript ID:                  | bmjopen-2013-003568.R1                                                                                                                                                                                                                                                                                                                                                                                                                                                                                                                                                                                                                                                                                                                                                                    |
| Article Type:                   | Research                                                                                                                                                                                                                                                                                                                                                                                                                                                                                                                                                                                                                                                                                                                                                                                  |
| Date Submitted by the Author:   | 08-Aug-2013                                                                                                                                                                                                                                                                                                                                                                                                                                                                                                                                                                                                                                                                                                                                                                               |
| Complete List of Authors:       | Vandenplas, Olivier; Centre Hospitalier Universitaire de Mont-Godinne; Université Catholique de Louvain, Department of Chest Medicine<br>D'Alpaos, Vinciane; Centre Hospitalier Universitaire de Mont-Godinne; Université Catholique de Louvain, Department of Chest Medicine<br>Evrard, Geneviève; Centre Hospitalier Universitaire de Mont-Godinne; Université Catholique de Louvain, Department of Chest Medicine<br>JAMART, Jacques; CHU Mont-Godinne, Scientific Support<br>Thimpont, Joël; Fonds des Maladies Professionnelles, Medicine<br>Huaux, François; Université Catholique de Louvain, Industrial Toxicology and Occupational Medicine Unit<br>Renauld, Jean-Christophe; Ludwig Institute for Cancer Research, Université Catholique de Louvain, Experimental Medicine Unit |
| <b>Primary Subject Heading</b>: | Occupational and environmental medicine                                                                                                                                                                                                                                                                                                                                                                                                                                                                                                                                                                                                                                                                                                                                                   |
| Secondary Subject Heading:      | Respiratory medicine                                                                                                                                                                                                                                                                                                                                                                                                                                                                                                                                                                                                                                                                                                                                                                      |
| Keywords:                       | Asthma < THORACIC MEDICINE, Bronchoprovocation tests, Occupational disease, Cleaning                                                                                                                                                                                                                                                                                                                                                                                                                                                                                                                                                                                                                                                                                                      |
|                                 |                                                                                                                                                                                                                                                                                                                                                                                                                                                                                                                                                                                                                                                                                                                                                                                           |

SCHOLARONE™  
Manuscripts

## ASTHMA RELATED TO CLEANING AGENTS: A CLINICAL INSIGHT

Olivier Vandenplas,<sup>1,2</sup> Vinciane D'Alpaos,<sup>1</sup> Geneviève Evrard,<sup>1</sup> Jacques Jamart,<sup>3</sup>  
Joel Thimpont,<sup>2</sup> François Huaux,<sup>4</sup> Jean-Christophe Renauld,<sup>5</sup>

**Running head:** Cleaners' asthma

**Affiliations:**

<sup>1</sup> Department of Chest Medicine, *Centre Hospitalier Universitaire de Mont-Godinne; Université Catholique de Louvain*, Yvoir, Belgium;

<sup>2</sup> *Fonds des Maladies Professionnelles*, Brussels, Belgium;

<sup>3</sup> Scientific Support Unit, *Centre Hospitalier Universitaire de Mont-Godinne; Université Catholique de Louvain*, Yvoir, Belgium.

<sup>4</sup> Industrial Toxicology and Occupational Medicine Unit, *Université Catholique de Louvain*, Brussels; Belgium

<sup>5</sup> Ludwig Institute for Cancer Research, Experimental Medicine Unit, *Université Catholique de Louvain*, Brussels; Belgium

**Corresponding author:** Dr Olivier Vandenplas, Department of Chest Medicine, Centre Hospitalier Universitaire de Mont-Godinne; B-5530 Yvoir, Belgium; Tel: +32-81 42 33 63; e-mail: olivier.vandenplas@uclouvain.be

**Keywords:** Asthma; bronchoprovocation tests; cleaning, quaternary ammonium compounds; occupational disease.

**Word count body of manuscript:** 3,167 words

1  
2  
3 **1 List of abbreviations**  
4

5 2 AHR: Non-specific airway hyperresponsiveness  
6

7 3 FEV<sub>1</sub>: Forced expiratory volume in one second  
8

9 4 OA: Occupational asthma  
10

11 5 PC<sub>20</sub>: Provocative concentration of histamine causing a 20% fall in FEV<sub>1</sub>  
12

13 6 PEF: Peak expiratory flow  
14

15 7 QAC: Quaternary ammonium compound  
16

17 8 SIC: Specific inhalation challenge  
18

19 9 WCB: Workers' Compensation Board  
20

21 10  
22

23 11  
24  
25  
26  
27  
28  
29  
30  
31  
32  
33  
34  
35  
36  
37  
38  
39  
40  
41  
42  
43  
44  
45  
46  
47  
48  
49  
50  
51  
52  
53  
54  
55  
56  
57  
58  
59  
60

## ARTICLE SUMMARY

### Article focus

- There is accumulating evidence of an increased risk of asthma among cleaning workers, although the agents and mechanisms involved in the development of cleaning-related asthma remain largely uncertain.
- We undertook a retrospective case series analysis of all subjects who completed a specific inhalation challenge with cleaning/disinfecting materials over the period 1992-2011 in order to assess the pattern of bronchial responses induced by these agents and to evaluate the mechanisms involved in cleaning-related asthma.

### Key messages

- The asthmatic reactions induced by challenge exposures to cleaning agents were associated with a significant increase in post-challenge nonspecific airway hyperresponsiveness to histamine and/or an increase in sputum eosinophils
- This study based on specific inhalation challenges indicates that a substantial proportion of subjects who experience asthma symptoms related to cleaning materials may actually suffer from sensitizer-induced OA, predominantly caused by quaternary ammonium compounds.

### Strengths and limitations

- This is the first report describing the pattern of functional and sputum cell changes induced by cleaning/disinfecting materials. The findings provide further insight into the mechanisms of cleaning-related asthma and may have practical implications for the diagnosis and management of this condition.
- The major limitations of this study result from the lack of quantitative exposure assessment during the challenge tests and the selection of the studied population. The subjects described in this report may not accurately represent the whole population of workers with asthma related to cleaning activities; they may represent only a subset of

1  
2  
3 1 cleaning workers whom symptoms are severe enough for seeking specialized medical  
4  
5 2 advice and they did not include subjects with acute irritant-induced asthma.  
6  
7 3  
8  
9  
10  
11  
12  
13  
14  
15  
16  
17  
18  
19  
20  
21  
22  
23  
24  
25  
26  
27  
28  
29  
30  
31  
32  
33  
34  
35  
36  
37  
38  
39  
40  
41  
42  
43  
44  
45  
46  
47  
48  
49  
50  
51  
52  
53  
54  
55  
56  
57  
58  
59  
60

For peer review only

**ABSTRACT**

**Objective:** To determine the agents causing asthmatic reactions during specific inhalation challenges (SICs) in workers with cleaning-related asthma symptoms and to assess the pattern of bronchial responses in order to identify the mechanisms involved in cleaning-related asthma.

**Design:** A retrospective case series analysis.

**Setting:** The study included all subjects who completed a SIC procedure with the cleaning/disinfecting products suspected of causing work-related asthma over the period 1992-211 in a tertiary centre, which is the single specialized centre of the French-speaking part of Belgium where all subjects with work-related asthma are referred for SIC.

**Results:** The review identified 44 subjects who completed an SIC with cleaning/disinfecting agents. Challenge exposure to the suspected cleaning agents elicited a  $\geq 20\%$  fall in FEV<sub>1</sub> in 17 (39%) subjects. The cleaning products that induced a positive SIC contained quaternary ammonium compounds (n=10), glutaraldehyde (n=3), both of these agents (n=1), and ethanolamines (n=2). Positive SICs were associated with a significant decrease in the median (interquartile range) value of the provocative concentration of histamine causing a 20% fall in FEV<sub>1</sub> (PC<sub>20</sub>) from 1.4 (0.2-4.2) mg/ml at baseline to 0.5 (0.4-3.0) mg/ml after the challenge and a significant increase in sputum eosinophils from 1.8 (0.8-7.2)% at baseline to 10.0 (4.1-15.9)% 7 hours after the challenge exposure while these parameters did not significantly change in subjects with a negative SIC. Overall, 11 of 17 subjects with positive SICs showed a >3-fold decrease in post-challenge histamine PC<sub>20</sub> value, a >2% increase in sputum eosinophils, or both of these outcomes.

**Conclusions:** These data indicate that a substantial proportion of workers who experience asthma symptoms related to cleaning materials show a pattern of bronchial reaction consistent with sensitizer-induced occupational asthma. The results also suggest that quaternary ammonium compounds are the principal cause of sensitizer-induced OA among cleaners.

**Abstract word count:** 294 words

## 1 INTRODUCTION

2 In recent years, there has been a growing concern about the potential role of exposure to  
3 cleaning products in the initiation and aggravation of asthma.[1, 2] Epidemiological surveys  
4 have consistently documented increased prevalence[3-5] and incidence[6-8] rates of asthma  
5 in workers exposed to cleaning materials and/or disinfectants, especially in domestic  
6 cleaners[3, 4] and healthcare workers[9-12]. In addition, some studies have reported an  
7 increased risk of work-related asthma symptoms in exposed workers.[5, 12, 13]

8 However, there is still limited knowledge on the specific exposures and pathophysiological  
9 mechanisms involved in cleaning-related asthma.[1, 2] Cleaning materials typically contain a  
10 wide variety of ingredients, some of which are respiratory irritants, such as chlorine-releasing  
11 agents and ammonia, while others are potential airway sensitizers.[14, 15] Asthma in  
12 cleaners has been mostly associated with the irritant effects of cleaning products, which may  
13 exacerbate asthma and, at high exposure levels, cause acute irritant-induced asthma (or  
14 "reactive airways dysfunction syndrome").[10, 16-19] Nevertheless, occasional case reports  
15 have described occupational asthma (OA) due to specific airway hypersensitivity to  
16 components of detergents or disinfectants,[2] Overall the determinants of cleaning-related-  
17 asthma symptoms remain largely uncertain since most available studies have relied on self-  
18 reported symptoms or physician-based diagnosis. Only two studies have investigated the  
19 effects of cleaning exposures on peak expiratory flow (PEF) variability with inconsistent  
20 results.[20, 21]

21 Therefore, the data of subjects who completed specific inhalation challenges (SICs) with the  
22 cleaning agents and/or disinfectants suspected of causing their work-related asthma  
23 symptoms were reviewed in order: 1) to determine the prevalence and causes of asthmatic  
24 reactions induced by these agents; and 2) to compare the clinical features as well as the  
25 changes in nonspecific airway hyperresponsiveness (AHR) and sputum cell counts in  
26 subjects with positive or negative responses to SIC.

## 1           2           3           4           5           6           7           8           9           10           11           12           13           14           15           16           17           18           19           20           21           22           23           24           25           26           27           28           29           30           31           32           33           34           35           36           37           38           39           40           41           42           43           44           45           46           47           48           49           50           51           52           53           54           55           56           57           58           59           60

## 1           2           3           4           5           6           7           8           9           10           11           12           13           14           15           16           17           18           19           20           21           22           23           24           25

## 1           2           3           4           5           6           7           8           9           10           11           12           13           14           15           16           17           18           19           20           21           22           23           24           25

1           2           3           4           5           6           7           8           9           10           11           12           13           14           15           16           17           18           19           20           21           22           23           24           25

2           3           4           5           6           7           8           9           10           11           12           13           14           15           16           17           18           19           20           21           22           23           24           25

3           4           5           6           7           8           9           10           11           12           13           14           15           16           17           18           19           20           21           22           23           24           25

4           5           6           7           8           9           10           11           12           13           14           15           16           17           18           19           20           21           22           23           24           25

5           6           7           8           9           10           11           12           13           14           15           16           17           18           19           20           21           22           23           24           25

6           7           8           9           10           11           12           13           14           15           16           17           18           19           20           21           22           23           24           25

7           8           9           10           11           12           13           14           15           16           17           18           19           20           21           22           23           24           25

8           9           10           11           12           13           14           15           16           17           18           19           20           21           22           23           24           25

9           10           11           12           13           14           15           16           17           18           19           20           21           22           23           24           25

10           11           12           13           14           15           16           17           18           19           20           21           22           23           24           25

11           12           13           14           15           16           17           18           19           20           21           22           23           24           25

12           13           14           15           16           17           18           19           20           21           22           23           24           25

13           14           15           16           17           18           19           20           21           22           23           24           25

14           15           16           17           18           19           20           21           22           23           24           25

15           16           17           18           19           20           21           22           23           24           25

16           17           18           19           20           21           22           23           24           25

17           18           19           20           21           22           23           24           25

18           19           20           21           22           23           24           25

19           20           21           22           23           24           25

20           21           22           23           24           25

21           22           23           24           25

22           23           24           25

23           24           25

24           25

25

### 6           7           8           9           10           11           12           13           14           15           16           17           18           19           20           21           22           23           24           25

### 6           7           8           9           10           11           12           13           14           15           16           17           18           19           20           21           22           23           24           25

### 6           7           8           9           10           11           12           13           14           15           16           17           18           19           20           21           22           23           24           25

6           7           8           9           10           11           12           13           14           15           16           17           18           19           20           21           22           23           24           25

7           8           9           10           11           12           13           14           15           16           17           18           19           20           21           22           23           24           25

8           9           10           11           12           13           14           15           16           17           18           19           20           21           22           23           24           25

9           10           11           12           13           14           15           16           17           18           19           20           21           22           23           24           25

10           11           12           13           14           15           16           17           18           19           20           21           22           23           24           25

11           12           13           14           15           16           17           18           19           20           21           22           23           24           25

12           13           14           15           16           17           18           19           20           21           22           23           24           25

13           14           15           16           17           18           19           20           21           22           23           24           25

14           15           16           17           18           19           20           21           22           23           24           25

15           16           17           18           19           20           21           22           23           24           25

16           17           18           19           20           21           22           23           24           25

17           18           19           20           21           22           23           24           25

18           19           20           21           22           23           24           25

19           20           21           22           23           24           25

20           21           22           23           24           25

21           22           23           24           25

22           23           24           25

23           24           25

24           25

25

13           14           15           16           17           18           19           20           21           22           23           24           25

14           15           16           17           18           19           20           21           22           23           24           25

15           16           17           18           19           20           21           22           23           24           25

16           17           18           19           20           21           22           23           24           25

17           18           19           20           21           22           23           24           25

18           19           20           21           22           23           24           25

19           20           21           22           23           24           25

20           21           22           23           24           25

21           22           23           24           25

22           23           24           25

23           24           25

24           25

25

### 18           19           20           21           22           23           24           25

### 18           19           20           21           22           23           24           25

### 18           19           20           21           22           23           24           25

18           19           20           21           22           23           24           25

19           20           21           22           23           24           25

20           21           22           23           24           25

21           22           23           24           25

22           23           24           25

23           24           25

24           25

25



1 reproducing as close as possible the conditions of exposure at the workplace.[24] The tested  
2 cleaning materials and the mode of exposure during SIC were selected based on the  
3 subjects' interview, the Material Safety Data Sheets, and, most often, an analysis of the job  
4 exposure by WCB's hygienists. The cleaning agents were diluted in cold or heated water,  
5 brushed on a cardboard and/or sprayed according to the collected information.

6 The duration of exposure to the cleaning products was gradually increased (i.e. 1 min, 4 min,  
7 10 min, 15 min, 30 min, and 60 min) on the same day until a  $\geq 20\%$  fall in FEV<sub>1</sub> occurred or a  
8 cumulative exposure of two hours was completed. Spirometry was obtained at baseline and  
9 serially after exposure for a total of at least six hours. A SIC was considered positive when a  
10 sustained  $\geq 20\%$  fall in FEV<sub>1</sub> was recorded. The level of AHR to histamine was determined at  
11 the end of the control day (i.e. baseline value), seven hours after the end of each active  
12 challenge when the FEV<sub>1</sub> was within 10% of baseline value, and 24 hours after the last active  
13 challenge.[25] AHR was expressed as the provocative concentration of histamine causing a  
14 20% fall in FEV<sub>1</sub> (PC<sub>20</sub>).[22] Since March 2006, sputum cell counts were assessed at the end  
15 of the control day and seven hours after the end of active challenges (i.e. after the  
16 assessment of AHR and administration of an inhaled bronchodilator). Sputum was induced  
17 through the inhalation of increasing concentrations (3%, 4%, and 5%) of hypertonic saline  
18 and processed as previously described.[26]

19 Those subjects who did not demonstrate a  $\geq 20\%$  fall in FEV<sub>1</sub> during the first active test day  
20 underwent a repeated challenge for a maximum of 2-3 hours on the next day. Further  
21 challenges were proposed when there was a  $>3$ -fold decrease in the post-challenge PC<sub>20</sub>  
22 value or a  $>3\%$  increase in sputum eosinophils as compared to the control day.[25, 26]

### 23 **Data analysis**

24 The following information was collected from the medical charts: 1) demographic, clinical,  
25 and occupational characteristics of the subjects; and 2) baseline functional data, histamine  
26 PC<sub>20</sub> value on the control day and after the last active challenge, as well as the

1  
2  
3 1 corresponding sputum cell counts when available. Changes in AHR were considered  
4  
5 2 significant when there was a >3-fold decrease in post-challenge histamine PC<sub>20</sub> compared to  
6  
7 3 baseline value.[25] An increase in sputum eosinophils of more than two percentage points  
8  
9 4 compared with the control day value was regarded as clinically relevant.[25, 27]

10  
11  
12 5 Quantitative data are presented as median and 25<sup>th</sup> and 75<sup>th</sup> interquartile range.  
13  
14 6 Comparisons between subgroups of subjects were made using the chi-squared test, Fisher  
15  
16 7 exact test, or Wilcoxon rank-sum test as appropriate. The Wilcoxon signed-rank test was  
17  
18 8 used for comparing variables before and after SIC in the same subjects. All statistical tests  
19  
20 9 were two-tailed; a p-value <0.05 was considered significant. Statistical analysis was  
21  
22 10 performed using the IBM SPSS Statistics 19.0 software (SPSS Inc, Chicago, Ill).  
23  
24  
25  
26  
27  
28  
29  
30  
31  
32  
33  
34  
35  
36  
37  
38  
39  
40  
41  
42  
43  
44  
45  
46  
47  
48  
49  
50  
51  
52  
53  
54  
55  
56  
57  
58  
59  
60

## 1 RESULTS

### 2 Baseline characteristics

3 During the reviewed period, 44 of 713 (6%) subjects were challenged with cleaning agents  
4 and/or disinfectants. The main demographic, occupational, and clinical characteristics of the  
5 subjects are presented in Table 1. A  $\geq 20\%$  decrease in FEV<sub>1</sub> was recorded during SIC in 17  
6 (39%) of the subjects, 24% showing an isolated immediate reaction, 18% an isolated late  
7 reaction, 29% dual reactions, and 30% atypical reactions. The proportion of subjects referred  
8 for possible OA due to cleaning agents among all subjects evaluated through an SIC  
9 procedure in our centre increased from 3.2% (10 of 316) during the period 1992-2001 to  
10 8.6% (34 of 397,  $p=0.003$ ) from 2002 to 2011. The vast majority of the subjects with a  
11 positive SIC (16 of 17) had been evaluated during the last decade (2002-2011).

12 The median (interquartile range) duration of exposure to cleaning agents that elicited an  
13 asthmatic reaction was 120 (32-150) minutes. The cleaning products that induced a positive  
14 FEV<sub>1</sub> response contained quaternary ammonium compounds (QAC) (mainly, benzalkonium  
15 and didecylmethylammonium chlorides) in 10 (59%) subjects, glutaraldehyde in three  
16 instances, both agents in one instance, and ethanolamines in two subjects (Table 1). No  
17 known sensitizing agent was identified in one subject who had been challenged with a  
18 cleaning product that contained sodium octylsulfate, nitrilotriacetic acid, and potassium  
19 hydroxide.

20 The subjects who developed an asthmatic response to cleaning agents and/or disinfectants  
21 did not differ from those who did not for most of the demographic and clinical characteristics.

22 The pattern of the work-related respiratory symptoms was similar in both groups (Table 1),  
23 although wheezing at work was slightly more frequently reported by subjects with a positive  
24 SIC (82% vs. 52%,  $p=0.056$ ). The subjects with a positive SIC tended to experience a lower  
25 level of asthma control. The proportion of these subjects who required the use of an inhaled  
26 short-acting beta<sub>2</sub>-agonist at least once a day was significantly higher (41%) as compared to

1 those with a negative SIC (4%;  $p=0.002$ ), although the daily dose of inhaled corticosteroids  
2 were similar in both groups. In addition, baseline spirometry revealed more often significant  
3 airway obstruction in subjects who showed a positive SIC (29%) than in those who did not  
4 (4%,  $p=0.016$ ).

#### 5 **Non-specific airway hyperresponsiveness**

6 At baseline, the subjects with a positive SIC to cleaning products showed a significantly  
7 lower median histamine  $PC_{20}$  value than those with a negative SIC ( $p=0.004$ ) (Table 2).  
8 Among the 27 subjects with a negative SIC, 13 (48%) failed to demonstrate significant airway  
9 hyperresponsiveness (i.e. histamine  $PC_{20}$  value  $>16$  mg/ml) at the pre-challenge  
10 assessment. These subjects differed from the 14 subjects with a histamine  $PC_{20}$  value  $\leq 16$   
11 mg/ml only by a longer duration of work-related asthma symptoms before the SIC (47 [21-70]  
12 months vs. 19 [6-41] months,  $p=0.036$ ).

13 A post-challenge histamine  $PC_{20}$  value was available in 12 of the 17 subjects who showed a  
14 positive SIC and in 25 of 27 subjects with a negative SIC. The post-challenge  $PC_{20}$  value  
15 was not measured because the  $FEV_1$  24 hours after the end of exposure was still  $\geq 20\%$   
16 lower than the pre-challenge value in four subjects with a positive SIC or because the  
17 subjects refused to complete the test in the other instances. Positive SICs were associated  
18 with a significant decrease in the median post-challenge  $PC_{20}$  value, whereas no change was  
19 documented in subjects with a negative SIC. Five of the 12 (42%) subjects with a positive  
20 SIC demonstrated a  $>3$ -fold decrease in post-challenge  $PC_{20}$  value, while none of those with  
21 a negative SIC did so.

#### 22 **Sputum cell counts**

23 Among the subjects who were investigated from 2006 onwards, a suitable sputum sample  
24 was obtained seven hours after the end of the last active challenge in 13 of 15 positive SICs  
25 and in seven of 11 negative SICs (Table 2). At baseline, the subjects with a positive SIC

1 showed a slightly higher sputum eosinophil percentage than those with a negative SIC  
 2 (p=0.046). Positive SICs were associated with a significant post-challenge increase in  
 3 sputum eosinophils, while eosinophil counts did not significantly change in negative SICs.  
 4 Eight (62%) of the 13 subjects with a positive SIC showed a >2% increase in post-challenge  
 5 eosinophils, while none of the subjects with a negative SIC did so. In subjects with a positive  
 6 SIC, there was an increase in the absolute number of sputum neutrophils after the last active  
 7 challenge while the percentage of neutrophils was not significantly different at baseline and  
 8 on the last challenge day.

9 Overall, positive SICs were associated with either a >3-fold decrease in post-challenge PC<sub>20</sub>  
 10 value in three subjects, a >2% increase in sputum eosinophils in six subjects, or both of  
 11 these outcomes in two subjects.

12 **Table 1. Demographic, occupational, and clinical characteristics of the subjects**

|                                                  | Positive SIC<br>(n=17) | Negative SIC<br>(n=27) | p-value |
|--------------------------------------------------|------------------------|------------------------|---------|
| Gender (female)                                  | 13 (76)                | 23 (85)                | 0.466   |
| Age, yr*                                         | 47 (39-49)             | 47 (35-53)             | 0.942   |
| Referral by WCB                                  | 13 (76)                | 20 (74)                | 0.858   |
| Job/industry :                                   |                        |                        |         |
| Professional cleaners:                           | 9                      | 15                     |         |
| Healthcare facilities                            | 2                      | 5                      |         |
| Various industries                               | 3                      | 4                      |         |
| Private houses                                   | 1                      | 3                      |         |
| Public buildings                                 | 2                      | 2                      |         |
| Kitchens                                         | 1                      | 1                      |         |
| Healthcare workers                               | 7                      | 9                      |         |
| Food workers                                     | 1                      | 2                      |         |
| Pharmaceutical workers                           | 0                      | 1                      |         |
| Exposure to respiratory sensitizers:             | 16 (94)                | 16 (59)                | 0.033   |
| QAC                                              | 10                     | 6                      |         |
| QAC and glutaraldehyde                           | 1                      | 3                      |         |
| Glutaraldehyde                                   | 3                      | 7                      |         |
| Ethanolamines                                    | 2                      | 0                      |         |
| No identified sensitizer                         | 1                      | 11                     |         |
| Current and ex-smokers                           | 6 (35)                 | 8 (30)                 | 0.694   |
| Atopy †                                          | 7 (41)                 | 13 (48)                | 0.651   |
| Asthma pre-existing to exposure                  | 2 (12)                 | 2 (7)                  | 0.624   |
| Duration of exposure before onset of asthma, mo* | 12 (5-153)             | 53 (31-165)            | 0.114   |
| Duration of asthma before SIC, mo*               | 25 (7-59)              | 25 (10-55)             | 0.980   |
| Delay since last work exposure, mo*              | 10 (0.3-16)            | 8 (0.1-24)             | 0.808   |

|                                                      |             |              |       |
|------------------------------------------------------|-------------|--------------|-------|
| Work-related respiratory symptoms:                   |             |              |       |
| Wheezing                                             | 14 (82)     | 14 (52)      | 0.056 |
| Breathlessness                                       | 14 (82)     | 20 (74)      | 0.716 |
| Cough                                                | 11 (65)     | 21 (78)      | 0.343 |
| Chest tightness                                      | 11 (65)     | 18 (67)      | 0.893 |
| Sputum                                               | 4 (24)      | 8 (30)       | 0.740 |
| Work-related rhinitis                                | 8 (47)      | 16 (59)      | 0.429 |
| Work-related dermatitis:                             | 5 (29)      | 5 (19)       | 0.401 |
| Inhaled corticosteroid:                              |             |              |       |
| No. with Inhaled corticosteroid                      | 13 (76)     | 15 (56)      | 0.160 |
| Low dose ‡                                           | 3 (18)      | 5 (19)       |       |
| Medium dose ‡                                        | 5 (29)      | 5 (19)       | 0.494 |
| High dose ‡                                          | 5 (29)      | 5 (19)       |       |
| Short-acting beta <sub>2</sub> -agonist ≥ once a day | 7 (41)      | 1 (4)        | 0.002 |
| Baseline FEV <sub>1</sub> , % predicted*             | 92 (73-101) | 100 (88-109) | 0.049 |
| Baseline FEV <sub>1</sub> /FVC, %*                   | 71 (63-77)  | 80 (73-83)   | 0.002 |
| Baseline airway obstruction ¥                        | 5 (29)      | 1 (4)        | 0.016 |

Legend: Data are presented as n (% of available data) unless otherwise specified. FEV<sub>1</sub>: forced expiratory volume in one-second; FVC: forced vital capacity; PC<sub>20</sub>: provocative concentration of histamine causing a 20% fall in FEV<sub>1</sub>; QAC: quaternary ammonium compound; SIC: specific inhalation challenge; WCB: workers' compensation board.

\*: Median value with 25<sup>th</sup>-75<sup>th</sup> interquartile range in parentheses;

‡: Atopy defined by a positive skin-prick test to at least one common inhalant allergen;

‡: Low dose: equal or less than 500 µg beclomethasone dipropionate equivalent per day; medium dose: more than 500 µg but equal or less than 1000 µg per day; and high dose: more than 1000 µg per day.

¥: Airway obstruction defined by an FEV<sub>1</sub> <80% predicted value and an FEV<sub>1</sub>/FVC ratio <70%.



## 1 DISCUSSION

2 This study showed that challenge exposure to the cleaning agents and/or disinfectants used  
3 at work induced an asthmatic reaction in 39% of the subjects who experienced asthma  
4 symptoms upon exposure to these products. In addition, the results of the SICs provided  
5 evidence supporting a specific hypersensitivity mechanism rather than a nonspecific  
6 bronchoconstriction due to an irritant effect. Indeed, eleven (65%) of the 17 positive SICs  
7 induced by cleaning agents were associated with a significant increase in post-challenge  
8 AHR, an increase in sputum eosinophils, or both of these outcomes. Noticeably, among the  
9 subjects who developed a positive bronchial response to QACs, a post-challenge increase in  
10 sputum eosinophils and/or in the level of AHR was documented in nine of ten instances.

11 To the best of our knowledge, this is the first study reporting the changes in lung function  
12 parameters and markers of airway inflammation in subjects challenged with the cleaning  
13 materials suspected of causing work-related asthma symptoms. Available evidence indicates  
14 that cleaning materials can both exacerbate asthma (i.e. work-exacerbated asthma) and  
15 induce the development of asthma (i.e. occupational asthma) through either immunological  
16 or irritant mechanisms.[12, 16, 19, 28] Medina-Ramon et al. investigated the daily changes in  
17 peak expiratory flow (PEF) in 43 female domestic cleaners with a recent history of asthma  
18 and/or chronic bronchitis.[20] There was no significant association between the changes in  
19 PEF and cleaning exposures, with the exception of a decrease in PEF at night that was  
20 related to the use of ammonia. Nevertheless, analysis of PEF data using the Occupational  
21 Asthma System (OASYS) program identified a work-related pattern in 30% of the subjects,  
22 but the specific exposures associated with these changes were not described. By contrast,  
23 Bernstein et al. reported an increase in lower respiratory tract symptoms during cleaning  
24 activities in asthmatic homemakers compared with non-asthmatics in the absence of  
25 significant changes in PEF.[21] Our findings in subjects with a positive SIC are consistent  
26 with previous studies which reported that an increase in AHR and sputum eosinophils occurs  
27 specifically – though inconstantly – in sensitized individuals who develop asthmatic reactions



1 induced by common inhalant allergens as well as high-molecular-weight and low-molecular-  
2 weight occupational agents.[29] Only one subject developed a  $\geq 20\%$  fall in FEV<sub>1</sub> on  
3 exposure to a degreasing spray that apparently did not contain a known sensitizing agent.  
4 This subject who reported pre-existing asthma, also failed to demonstrate a post-challenge  
5 increase in AHR or sputum eosinophils, suggesting that the bronchial response resulted from  
6 an irritant effect consistent with the concept of “work-exacerbated asthma”. [30]

7 Noticeably, 13 subjects with a negative SIC showed AHR to histamine neither at baseline nor  
8 after challenge exposure to the cleaning agents (Table 2), although nine of them were  
9 treated with an inhaled corticosteroid. These findings are consistent with those reported by  
10 Chiry et al. who found that a high proportion (57%) of subjects referred to tertiary centres for  
11 work-related asthma symptoms failed to demonstrate any functional evidence of asthma,  
12 although they experienced respiratory symptoms that were similar to those diagnosed as  
13 having OA or work-exacerbated asthma, except for a lower prevalence of wheezing.[31] A  
14 recent population-based questionnaire survey of health care workers exposed to cleaning  
15 materials also found that a high proportion (64%) of the subjects who experienced work-  
16 related asthma symptoms had not been given a diagnosis of asthma.[12]

17 There is little information on the specific agents involved in the various phenotypes of asthma  
18 related to cleaning exposure. Most epidemiological studies have linked asthma with  
19 exposure to irritant cleaning materials, mainly bleach,[9, 11, 12, 17, 28] ammonia,[9, 11, 12,  
20 20, 28] and cleaning/degreasing sprays.[9, 11, 12, 20] On the other hand, occasional case  
21 reports have described OA presumably due to specific sensitization to disinfectants, such as  
22 chloramine-T, glutaraldehyde, QACs, and isothiazolinone, surfactants, ethanolamines used  
23 in wax-removing compounds, and detergent enzymes.[1, 2] Among the cases of asthma  
24 related to cleaning products identified by the US Sentinel Event Notification Systems for  
25 Occupational Risks (SENSOR), 62% were considered as “OA with a latency period”, but only  
26 14% of these cases were related to an identified respiratory sensitizer.[16] A recent Finnish  
27 report described 20 cases of OA diagnosed in professional cleaning workers using SIC

1 during the period 1994-2004.[32] The majority (70%) of these cases were caused by moulds  
2 and non-cleaning chemicals (e.g. isocyanates) that were present at the workplace, whereas  
3 only six cases of OA were attributed to cleaning agents, including ethanolamines and  
4 chloramine-T. Our study focusing on the role of cleaning products and/or disinfectants  
5 indicates that QACs are the most frequent agent causing OA in workers exposed to such  
6 materials in various occupations. Very few cases of OA due to QACs have been reported in  
7 the literature,[33, 34] although these compounds are widely used in cleaning products.[14,  
8 15] QACs are non-volatile, but it is likely that inhalation exposure may occur during spray  
9 application of the products.[14, 15] The immunological mechanisms involved in the  
10 development of specific airway hypersensitivity to QACs is unknown as it is the case for most  
11 low-molecular-weight occupational agents.[29]

12 The major limitation of this study results from the lack of quantitative exposure assessment  
13 during the SICs. The agents that induced the observed asthmatic reactions could not be  
14 formally identified since the subjects were challenged with the commercial products they  
15 used at work, which most often contained a mixture of various potentially sensitizing and  
16 irritant compounds. The causal agents could only be inferred from their known asthmagenic  
17 potential. The asthma hazard index of QACs (0.81 to 0.95), glutaraldehyde (0.82), and  
18 ethanolamines (0.64 to 0.86) derived from a quantitative structure activity relationship model  
19 is above the cut-off value of 0.5, which predicts the potential for inducing OA with a sensitivity  
20 of 86% and a specificity of 99% (Seed MJ, personal communication;  
21 <http://www.coeh.man.ac.uk/research/asthma/>; last accessed 28 January 2012) [35].

22 The subjects described in this report may not accurately represent the whole population of  
23 workers with asthma related to cleaning activities. The data were derived from the single  
24 specialized centre of the French-speaking part of Belgium (~1.7 million active workers) where  
25 all SICs were performed during the period from 1992 to 2011. However, the subjects  
26 evaluated in this study may represent only a subset of cleaning workers whom symptoms are  
27 severe enough for seeking specialized medical advice or claim compensation. It is likely that

1 domestic cleaners were largely underrepresented in our series since most private home  
2 cleaners are employed in the informal sector and are not eligible for compensation. Failure to  
3 refer workers with possible cleaning-related asthma to our tertiary centre may also result  
4 from under-recognition of the condition by health care providers and reluctance by workers to  
5 seek medical advice for work-related symptoms because of concerns about adverse  
6 professional and financial consequences, as already outlined for work-related asthma in  
7 general.[36, 37] However, facilities for performing objective assessment of work-related  
8 asthma are easily available in Belgium, SIC procedures are paid by the WCB, and those  
9 workers who qualify for compensation are entitled to receive several types of financial  
10 awards, which are better than those obtained from the national health insurance. Noteworthy,  
11 the study focused on individuals who experienced work-related asthma symptoms that were  
12 directly related to cleaning products and/or disinfectants; those with symptoms related to  
13 workplace agents other than cleaning products were not included in this study.

14 This study did not allow for estimating the incidence of OA among workers exposed to  
15 cleaning/disinfecting materials. Indeed, the number of workers exposed to these agents in  
16 the French-speaking part of Belgium could not be accurately determined since the subjects  
17 with cleaning-related asthma were employed in a wide spectrum of occupations and  
18 industrial sectors. Despite their inherent limitations, the data yield some suggestion as to a  
19 recent increase in OA caused by cleaning/disinfecting materials, since most cases in our  
20 series were evaluated during the last ten years of the study period.

## 21 **CONCLUSION**

22 This study based on SICs indicates that a substantial proportion of subjects who experience  
23 asthma symptoms related to cleaning materials actually suffer from sensitizer-induced OA,  
24 predominantly caused by QACs. The findings of this study may help to improve the  
25 diagnosis, management and prevention of cleaning-related asthma, although further  
26 investigation is required to identify the underlying pathophysiological mechanisms.

1  
2  
3 1 **Acknowledgements:**  
4

5  
6 2 The authors are grateful to Maria Roccaro-Luczak, Michael Duchene, and Stéphane  
7  
8 3 François from the *Fonds des Maladies Professionnelles*, Brussels, Belgium who performed  
9  
10 4 most of the job exposure assessments. They also thank James Hatch for reviewing the  
11  
12 5 manuscript.  
13

14  
15 6 **Contributorship statement:**  
16

17  
18 7 OV, JT, JCR, and FH: Conception of the study, interpretation of data, and reviewing of the  
19  
20 8 manuscript; VD, GE, and JJ: Data collection, analysis of data, and reviewing of the  
21  
22 9 manuscript. OV supervised specific inhalation challenges, drafted the initial version of the  
23  
24 10 manuscript, and acts as guarantor of the final content of the manuscript.  
25

26  
27 11 **Data sharing statement:**  
28

29  
30 12 Extra data is available by emailing [olivier.vandenplas@uclouvain.be](mailto:olivier.vandenplas@uclouvain.be)  
31  
32

33 13 **Funding:**  
34

35  
36 14 This work was supported by a grant from the *Actions de Recherche Concertées de la*  
37  
38 15 *Communauté Française de Belgique*.  
39

40  
41 16 **Competing interests:** None to declare.  
42  
43  
44 17  
45  
46  
47  
48  
49  
50  
51  
52  
53  
54  
55  
56  
57  
58  
59  
60

**REFERENCES**

1. Zock JP, Vizcaya D, Le Moual N. Update on asthma and cleaners. *Curr Opin Allergy Clin Immunol* 2010;10:114-20.
2. Quirce S, Barranco P. Cleaning agents and asthma. *J Investig Allergol Clin Immunol* 2010;20:542-50; quiz 2p following 50.
3. Zock JP, Kogevinas M, Sunyer J, et al. Asthma risk, cleaning activities and use of specific cleaning products among Spanish indoor cleaners. *Scand J Work Environ Health* 2001;27:76-81.
4. Medina-Ramon M, Zock JP, Kogevinas M, et al. Asthma symptoms in women employed in domestic cleaning: a community based study. *Thorax* 2003;58:950-4.
5. Arif AA, Delclos GL, Whitehead LW, et al. Occupational exposures associated with work-related asthma and work-related wheezing among U.S. workers. *Am J Ind Med* 2003;44:368-76.
6. Karjalainen A, Martikainen R, Karjalainen J, et al. Excess incidence of asthma among Finnish cleaners employed in different industries. *Eur Respir J* 2002;19:90-5.
7. Kogevinas M, Zock JP, Jarvis D, et al. Exposure to substances in the workplace and new-onset asthma: an international prospective population-based study (ECRHS-II). *Lancet* 2007;370:336-41.
8. Ghosh RE, Cullinan P, Fishwick D, et al. Asthma and occupation in the 1958 birth cohort. *Thorax* 2013;68:365-71.
9. Mirabelli MC, Zock JP, Plana E, et al. Occupational risk factors for asthma among nurses and related healthcare professionals in an international study. *Occup Environ Med* 2007;64:474-9.
10. Delclos GL, Gimeno D, Arif AA, et al. Occupational risk factors and asthma among health care professionals. *Am J Respir Crit Care Med* 2007;175:667-75.

- 1 11. Vizcaya D, Mirabelli MC, Anto JM, et al. A workforce-based study of occupational  
2 exposures and asthma symptoms in cleaning workers. *Occup Environ Med*  
3 2011;68:914-9.
- 4 12. Arif AA, Delclos GL. Association between cleaning-related chemicals and work-related  
5 asthma and asthma symptoms among healthcare professionals. *Occup Environ Med*  
6 2012;69:35-40.
- 7 13. Obadia M, Liss GM, Lou W, et al. Relationships between asthma and work exposures  
8 among non-domestic cleaners in Ontario. *Am J Ind Med* 2009;52:716-23.
- 9 14. Wolkoff P, Schneider T, Kildeso J, et al. Risk in cleaning: chemical and physical  
10 exposure. *Sci Total Environ* 1998;215:135-56.
- 11 15. Bello A, Quinn MM, Perry MJ, et al. Characterization of occupational exposures to  
12 cleaning products used for common cleaning tasks--a pilot study of hospital cleaners.  
13 *Environ Health* 2009;8:11.
- 14 16. Rosenman KD, Reilly MJ, Schill DP, et al. Cleaning products and work-related asthma. *J*  
15 *Occup Environ Med* 2003;45:556-63.
- 16 17. Medina-Ramon M, Zock JP, Kogevinas M, et al. Asthma, chronic bronchitis, and  
17 exposure to irritant agents in occupational domestic cleaning: a nested case-control  
18 study. *Occup Environ Med* 2005;62:598-606.
- 19 18. Orriols R, Costa R, Albanell M, et al. Reported occupational respiratory diseases in  
20 Catalonia. *Occup Environ Med* 2006;63:255-60.
- 21 19. Vizcaya D, Mirabelli MC, Orriols R, et al. Functional and biological characteristics of  
22 asthma in cleaning workers. *Respir Med* 2013;107:673-83.
- 23 20. Medina-Ramon M, Zock JP, Kogevinas M, et al. Short-term respiratory effects of  
24 cleaning exposures in female domestic cleaners. *Eur Respir J* 2006;27:1196-203.
- 25 21. Bernstein JA, Brandt D, Rezvani M, et al. Evaluation of cleaning activities on respiratory  
26 symptoms in asthmatic female homemakers. *Ann Allergy Asthma Immunol* 2009;102:41-  
27 6.

- 1  
2  
3 1 22. Sterk PJ, Fabbri LM, Quanjer PH, et al. Airway responsiveness. Standardized challenge  
4 testing with pharmacological, physical and sensitizing stimuli in adults. Report Working  
5 Party Standardization of Lung Function Tests, European Community for Steel and Coal.  
6 Official Statement of the European Respiratory Society. *Eur Respir J Suppl* 1993;16:53-  
7 83.  
8  
9 23. Vandenas O, Malo JL. Inhalation challenges with agents causing occupational asthma.  
10 *Eur Respir J* 1997;10:2612-29.  
11  
12 24. Pepys J, Hutchcroft BJ. Bronchial provocation tests in etiologic diagnosis and analysis of  
13 asthma. *Am Rev Respir Dis* 1975;112:829-59.  
14  
15 25. Vandenas O, Delwiche JP, Jamart J, et al. Increase in non-specific bronchial  
16 hyperresponsiveness as an early marker of bronchial response to occupational agents  
17 during specific inhalation challenges. *Thorax* 1996;51:472-8.  
18  
19 26. Vandenas O, D'Alpaos V, Heymans J, et al. Sputum eosinophilia: an early marker of  
20 bronchial response to occupational agents. *Allergy* 2009;64:754-61.  
21  
22 27. Girard F, Chaboillez S, Cartier A, et al. An effective strategy for diagnosing occupational  
23 asthma: use of induced sputum. *Am J Respir Crit Care Med* 2004;170:845-50.  
24  
25 28. de Fatima Macaira E, Algranti E, Medina Coeli Mendonca E, et al. Rhinitis and asthma  
26 symptoms in non-domestic cleaners from the Sao Paulo metropolitan area, Brazil.  
27 *Occup Environ Med* 2007;64:446-53.  
28  
29 29. Maestrelli P, Boschetto P, Fabbri LM, et al. Mechanisms of occupational asthma. *J*  
30 *Allergy Clin Immunol* 2009;123:531-42; quiz 43-4.  
31  
32 30. Nicholson PJ, Cullinan P, Taylor AJ, et al. Evidence based guidelines for the prevention,  
33 identification, and management of occupational asthma. *Occup Environ Med*  
34 2005;62:290-9.  
35  
36 31. Chiry S, Boulet LP, Lepage J, et al. Frequency of work-related respiratory symptoms in  
37 workers without asthma. *Am J Ind Med* 2009;52:447-54.  
38  
39 32. Makela R, Kauppi P, Suuronen K, et al. Occupational asthma in professional cleaning  
40 work: a clinical study. *Occup Med (Lond)* 2011;61:121-6.  
41  
42  
43  
44  
45  
46  
47  
48  
49  
50  
51  
52  
53  
54  
55  
56  
57  
58  
59  
60

- 1  
2  
3 1 33. Burge PS, Richardson MN. Occupational asthma due to indirect exposure to lauryl  
4  
5 2 dimethyl benzyl ammonium chloride used in a floor cleaner. *Thorax* 1994;49:842-3.  
6  
7 3 34. Purohit A, Kopferschmitt-Kubler MC, Moreau C, et al. Quaternary ammonium  
8  
9 4 compounds and occupational asthma. *Int Arch Occup Environ Health* 2000;73:423-7.  
10  
11 5 35. Seed M, Agius R. Further validation of computer-based prediction of chemical asthma  
12  
13 6 hazard. *Occup Med (Lond)* 2010;60:115-20.  
14  
15 7 36. Fishwick D, Bradshaw L, Davies J, et al. Are we failing workers with symptoms  
16  
17 8 suggestive of occupational asthma? *Prim Care Respir J* 2007;16:304-10.  
18  
19 9 37. Santos MS, Jung H, Peyrovi J, et al. Occupational asthma and work-exacerbated  
20  
21 10 asthma: factors associated with time to diagnostic steps. *Chest* 2007;131:1768-75.  
22  
23 11  
24  
25 12  
26  
27  
28  
29  
30  
31  
32  
33  
34  
35  
36  
37  
38  
39  
40  
41  
42  
43  
44  
45  
46  
47  
48  
49  
50  
51  
52  
53  
54  
55  
56  
57  
58  
59  
60



STROBE 2007 (v4) Statement—Checklist of items that should be included in reports of *cross-sectional studies*

| Section/Topic                | Item # | Recommendation                                                                                                                                                                       | Reported on page # |
|------------------------------|--------|--------------------------------------------------------------------------------------------------------------------------------------------------------------------------------------|--------------------|
| Title and abstract           | 1      | (a) Indicate the study's design with a commonly used term in the title or the abstract                                                                                               | 5                  |
|                              |        | (b) Provide in the abstract an informative and balanced summary of what was done and what was found                                                                                  | 5                  |
| <b>Introduction</b>          |        |                                                                                                                                                                                      |                    |
| Background/rationale         | 2      | Explain the scientific background and rationale for the investigation being reported                                                                                                 | 6                  |
| Objectives                   | 3      | State specific objectives, including any prespecified hypotheses                                                                                                                     | 6                  |
| <b>Methods</b>               |        |                                                                                                                                                                                      |                    |
| Study design                 | 4      | Present key elements of study design early in the paper                                                                                                                              | 7                  |
| Setting                      | 5      | Describe the setting, locations, and relevant dates, including periods of recruitment, exposure, follow-up, and data collection                                                      | 7                  |
| Participants                 | 6      | (a) Give the eligibility criteria, and the sources and methods of selection of participants                                                                                          | 7                  |
| Variables                    | 7      | Clearly define all outcomes, exposures, predictors, potential confounders, and effect modifiers. Give diagnostic criteria, if applicable                                             | 7-8                |
| Data sources/<br>measurement | 8*     | For each variable of interest, give sources of data and details of methods of assessment (measurement). Describe comparability of assessment methods if there is more than one group | 7-8                |
| Bias                         | 9      | Describe any efforts to address potential sources of bias                                                                                                                            | 7                  |
| Study size                   | 10     | Explain how the study size was arrived at                                                                                                                                            | 7                  |
| Quantitative variables       | 11     | Explain how quantitative variables were handled in the analyses. If applicable, describe which groupings were chosen and why                                                         | 7-9                |
| Statistical methods          | 12     | (a) Describe all statistical methods, including those used to control for confounding                                                                                                | 8-9                |
|                              |        | (b) Describe any methods used to examine subgroups and interactions                                                                                                                  | 8-9                |
|                              |        | (c) Explain how missing data were addressed                                                                                                                                          | 8-9                |
|                              |        | (d) If applicable, describe analytical methods taking account of sampling strategy                                                                                                   | NA                 |
|                              |        | (e) Describe any sensitivity analyses                                                                                                                                                | NA                 |
| <b>Results</b>               |        |                                                                                                                                                                                      |                    |

|                          |     |                                                                                                                                                                                                              |       |
|--------------------------|-----|--------------------------------------------------------------------------------------------------------------------------------------------------------------------------------------------------------------|-------|
| Participants             | 13* | (a) Report numbers of individuals at each stage of study—eg numbers potentially eligible, examined for eligibility, confirmed eligible, included in the study, completing follow-up, and analysed            | 10    |
|                          |     | (b) Give reasons for non-participation at each stage                                                                                                                                                         | NA    |
|                          |     | (c) Consider use of a flow diagram                                                                                                                                                                           | NA    |
| Descriptive data         | 14* | (a) Give characteristics of study participants (eg demographic, clinical, social) and information on exposures and potential confounders                                                                     | 10    |
|                          |     | (b) Indicate number of participants with missing data for each variable of interest                                                                                                                          | 11-12 |
| Outcome data             | 15* | Report numbers of outcome events or summary measures                                                                                                                                                         | 11-12 |
| Main results             | 16  | (a) Give unadjusted estimates and, if applicable, confounder-adjusted estimates and their precision (eg, 95% confidence interval). Make clear which confounders were adjusted for and why they were included | NA    |
|                          |     | (b) Report category boundaries when continuous variables were categorized                                                                                                                                    | NA    |
|                          |     | (c) If relevant, consider translating estimates of relative risk into absolute risk for a meaningful time period                                                                                             | NA    |
| Other analyses           | 17  | Report other analyses done—eg analyses of subgroups and interactions, and sensitivity analyses                                                                                                               | NA    |
| <b>Discussion</b>        |     |                                                                                                                                                                                                              |       |
| Key results              | 18  | Summarise key results with reference to study objectives                                                                                                                                                     | 12    |
| Limitations              | 19  | Discuss limitations of the study, taking into account sources of potential bias or imprecision. Discuss both direction and magnitude of any potential bias                                                   | 14-15 |
| Interpretation           | 20  | Give a cautious overall interpretation of results considering objectives, limitations, multiplicity of analyses, results from similar studies, and other relevant evidence                                   | 12-15 |
| Generalisability         | 21  | Discuss the generalisability (external validity) of the study results                                                                                                                                        | 12-15 |
| <b>Other information</b> |     |                                                                                                                                                                                                              |       |
| Funding                  | 22  | Give the source of funding and the role of the funders for the present study and, if applicable, for the original study on which the present article is based                                                | 16    |

\*Give information separately for cases and controls in case-control studies and, if applicable, for exposed and unexposed groups in cohort and cross-sectional studies.

**Note:** An Explanation and Elaboration article discusses each checklist item and gives methodological background and published examples of transparent reporting. The STROBE checklist is best used in conjunction with this article (freely available on the Web sites of PLoS Medicine at <http://www.plosmedicine.org/>, Annals of Internal Medicine at <http://www.annals.org/>, and Epidemiology at <http://www.epidem.com/>). Information on the STROBE Initiative is available at [www.strobe-statement.org](http://www.strobe-statement.org).

## ASTHMA RELATED TO CLEANING AGENTS: A CLINICAL INSIGHT

Olivier Vandenplas,<sup>1,2</sup> Vinciane D'Alpaos,<sup>1</sup> Geneviève Evrard,<sup>1</sup> Jacques Jamart,<sup>3</sup>  
Joel Thimpont,<sup>2</sup> François Huaux,<sup>4</sup> Jean-Christophe Renauld,<sup>5</sup>

**Running head:** Cleaners' asthma

**Affiliations:**

<sup>1</sup> Department of Chest Medicine, *Centre Hospitalier Universitaire de Mont-Godinne; Université Catholique de Louvain*, Yvoir, Belgium;

<sup>2</sup> *Fonds des Maladies Professionnelles*, Brussels, Belgium;

<sup>3</sup> Scientific Support Unit, *Centre Hospitalier Universitaire de Mont-Godinne; Université Catholique de Louvain*, Yvoir, Belgium.

<sup>4</sup> Industrial Toxicology and Occupational Medicine Unit, *Université Catholique de Louvain*, Brussels; Belgium

<sup>5</sup> Ludwig Institute for Cancer Research, Experimental Medicine Unit, *Université Catholique de Louvain*, Brussels; Belgium

**Corresponding author:** Dr Olivier Vandenplas, Department of Chest Medicine, Centre Hospitalier Universitaire de Mont-Godinne; B-5530 Yvoir, Belgium; Tel: +32-81 42 33 63; e-mail: olivier.vandenplas@uclouvain.be

**Keywords:** Asthma; bronchoprovocation tests; cleaning, quaternary ammonium compounds; occupational disease.

**Word count body of manuscript:** 3,167 words

1  
2  
3  
4  
5  
6  
7  
8  
9  
10  
11  
12  
13  
14  
15  
16  
17  
18  
19  
20  
21  
22  
23  
24  
25  
26  
27  
28  
29  
30  
31  
32  
33  
34  
35  
36  
37  
38  
39  
40  
41  
42  
43  
44  
45  
46  
47  
48  
49  
50  
51  
52  
53  
54  
55  
56  
57  
58  
59  
60

1 **List of abbreviations**

2 AHR: Non-specific airway hyperresponsiveness

3 FEV<sub>1</sub>: Forced expiratory volume in one second

4 OA: Occupational asthma

5 PC<sub>20</sub>: Provocative concentration of histamine causing a 20% fall in FEV<sub>1</sub>

6 PEF: Peak expiratory flow

7 QAC: Quaternary ammonium compound

8 SIC: Specific inhalation challenge

9 WCB: Workers' Compensation Board

10

11

## ARTICLE SUMMARY

### Article focus

- There is accumulating evidence of an increased risk of asthma among cleaning workers, although the agents and mechanisms involved in the development of cleaning-related asthma remain largely uncertain.
- We undertook a retrospective case series analysis of all subjects who completed a specific inhalation challenge with cleaning/disinfecting materials over the period 1992-2011 in order to assess the pattern of bronchial responses induced by these agents and to evaluate the mechanisms involved in cleaning-related asthma.

### Key messages

- The asthmatic reactions induced by challenge exposures to cleaning agents were associated with a significant increase in post-challenge nonspecific airway hyperresponsiveness to histamine and/or an increase in sputum eosinophils
- This study based on specific inhalation challenges indicates that a substantial proportion of subjects who experience asthma symptoms related to cleaning materials may actually suffer from sensitizer-induced OA, predominantly caused by quaternary ammonium compounds.

### Strengths and limitations

- This is the first report describing the pattern of functional and sputum cell changes induced by cleaning/disinfecting materials. The findings provide further insight into the mechanisms of cleaning-related asthma and may have practical implications for the diagnosis and management of this condition.
- The major limitations of this study result from the lack of quantitative exposure assessment during the challenge tests and the selection of the studied population. The subjects described in this report may not accurately represent the whole population of workers with asthma related to cleaning activities; they may represent only a subset of

1  
2  
3  
4  
5  
6  
7  
8  
9  
10  
11  
12  
13  
14  
15  
16  
17  
18  
19  
20  
21  
22  
23  
24  
25  
26  
27  
28  
29  
30  
31  
32  
33  
34  
35  
36  
37  
38  
39  
40  
41  
42  
43  
44  
45  
46  
47  
48  
49  
50  
51  
52  
53  
54  
55  
56  
57  
58  
59  
60

1 cleaning workers whom symptoms are severe enough for seeking specialized medical  
2 advice and they did not include subjects with acute irritant-induced asthma.

3

For peer review only

**ABSTRACT**

**Objective:** To determine the agents causing asthmatic reactions during specific inhalation challenges (SICs) in workers with cleaning-related asthma symptoms and to assess the pattern of bronchial responses in order to identify the mechanisms involved in cleaning-related asthma.

**Design:** A retrospective case series analysis.

**Setting:** The study included all subjects who completed a SIC procedure with the cleaning/disinfecting products suspected of causing work-related asthma over the period 1992-211 in a tertiary centre, which is the single specialized centre of the French-speaking part of Belgium where all subjects with work-related asthma are referred for SIC.

**Results:** The review identified 44 subjects who completed an SIC with cleaning/disinfecting agents. Challenge exposure to the suspected cleaning agents elicited a  $\geq 20\%$  fall in FEV<sub>1</sub> in 17 (39%) subjects. The cleaning products that induced a positive SIC contained quaternary ammonium compounds (n=10), glutaraldehyde (n=3), both of these agents (n=1), and ethanolamines (n=2). Positive SICs were associated with a significant decrease in the median (interquartile range) value of the provocative concentration of histamine causing a 20% fall in FEV<sub>1</sub> (PC<sub>20</sub>) from 1.4 (0.2-4.2) mg/ml at baseline to 0.5 (0.4-3.0) mg/ml after the challenge and a significant increase in sputum eosinophils from 1.8 (0.8-7.2)% at baseline to 10.0 (4.1-15.9)% 7 hours after the challenge exposure while these parameters did not significantly change in subjects with a negative SIC. Overall, 11 of 17 subjects with positive SICs showed a >3-fold decrease in post-challenge histamine PC<sub>20</sub> value, a >2% increase in sputum eosinophils, or both of these outcomes.

**Conclusions:** These data indicate that a substantial proportion of workers who experience asthma symptoms related to cleaning materials show a pattern of bronchial reaction consistent with sensitizer-induced occupational asthma. The results also suggest that quaternary ammonium compounds are the principal cause of sensitizer-induced OA among cleaners.

**Abstract word count:** 294 words

## 1 INTRODUCTION

2 In recent years, there has been a growing concern about the potential role of exposure to  
3 cleaning products in the initiation and aggravation of asthma.[1, 2] Epidemiological surveys  
4 have consistently documented increased prevalence[3-5] and incidence[6-8] rates of asthma  
5 in workers exposed to cleaning materials and/or disinfectants, especially in domestic  
6 cleaners[3, 4] and healthcare workers[9-12]. In addition, some studies have reported an  
7 increased risk of work-related asthma symptoms in exposed workers.[5, 12, 13]

8 However, there is still limited knowledge on the specific exposures and pathophysiological  
9 mechanisms involved in cleaning-related asthma.[1, 2] Cleaning materials typically contain a  
10 wide variety of ingredients, some of which are respiratory irritants, such as chlorine-releasing  
11 agents and ammonia, while others are potential airway sensitizers.[14, 15] Asthma in  
12 cleaners has been mostly associated with the irritant effects of cleaning products, which may  
13 exacerbate asthma and, at high exposure levels, cause acute irritant-induced asthma (or  
14 "reactive airways dysfunction syndrome").[10, 16-19] Nevertheless, occasional case reports  
15 have described occupational asthma (OA) due to specific airway hypersensitivity to  
16 components of detergents or disinfectants,[2] Overall the determinants of cleaning-related-  
17 asthma symptoms remain largely uncertain since most available studies have relied on self-  
18 reported symptoms or physician-based diagnosis. Only two studies have investigated the  
19 effects of cleaning exposures on peak expiratory flow (PEF) variability with inconsistent  
20 results.[20, 21]

21 Therefore, the data of subjects who completed specific inhalation challenges (SICs) with the  
22 cleaning agents and/or disinfectants suspected of causing their work-related asthma  
23 symptoms were reviewed in order: 1) to determine the prevalence and causes of asthmatic  
24 reactions induced by these agents; and 2) to compare the clinical features as well as the  
25 changes in nonspecific airway hyperresponsiveness (AHR) and sputum cell counts in  
26 subjects with positive or negative responses to SIC.



## 1 METHODS

2 This study was a retrospective analysis of the charts of all subjects investigated through a  
3 SIC in our tertiary centre during the period of 1992-2011 for asthma symptoms related to  
4 cleaning products and/or disinfectants. The study was approved by the *Comité d'éthique*  
5 *médicale* of the *Centre Hospitalier Universitaire de Mont-Godinne*; approval number 84/2012.

### 6 Subjects

7 In our centre, SICs with the occupational agent(s) suspected of causing work-related  
8 symptoms are routinely performed to diagnose OA provided that the baseline FEV<sub>1</sub> is equal  
9 to or above 60% of the predicted value.[22] The subjects are referred either by their  
10 attending physicians or by the Belgian Workers' Compensation Board (WCB). All French-  
11 speaking workers submitting a claim for work-related asthma to the WCB are referred to our  
12 centre in order to perform a SIC procedure.

13 The subjects who completed a SIC procedure with cleaning agents and/or disinfectants were  
14 identified from a database of 713 subjects who underwent a SIC for possible work-related  
15 asthma from 1992 up to 2011. Professional cleaners who had been challenged with latex  
16 gloves (n=23) or non-cleaning chemicals present at the workplace (n=3) were excluded from  
17 this analysis.

### 18 Specific inhalation challenges

19 SICs were completed according to a standardized protocol, which remained unchanged  
20 throughout the studied period.[23]. On the first test day, a "control" challenge was performed  
21 by exposing the subjects to a paint diluent containing a mixture of alkyl esters, ketones, and  
22 aromatic hydrocarbons nebulised in a five-cubic-meter challenge room for 30 min in order to  
23 ensure that fluctuations in FEV<sub>1</sub> were ≤12%. On the following day(s), the subjects were  
24 challenged with the cleaning product(s) suspected of causing their asthma symptoms at  
25 work. Exposure to these products was generated through a "realistic" approach aimed at

1  
2  
3 1 reproducing as close as possible the conditions of exposure at the workplace.[24] The tested  
4  
5 2 cleaning materials and the mode of exposure during SIC were selected based on the  
6  
7 3 subjects' interview, the Material Safety Data Sheets, and, most often, an analysis of the job  
8  
9 4 exposure by WCB's hygienists. The cleaning agents were diluted in cold or heated water,  
10  
11 5 brushed on a cardboard and/or sprayed according to the collected information.

12  
13  
14 6 The duration of exposure to the cleaning products was gradually increased (i.e. 1 min, 4 min,  
15  
16 7 10 min, 15 min, 30 min, and 60 min) on the same day until a  $\geq 20\%$  fall in FEV<sub>1</sub> occurred or a  
17  
18 8 cumulative exposure of two hours was completed. Spirometry was obtained at baseline and  
19  
20 9 serially after exposure for a total of at least six hours. A SIC was considered positive when a  
21  
22 10 sustained  $\geq 20\%$  fall in FEV<sub>1</sub> was recorded. The level of AHR to histamine was determined at  
23  
24 11 the end of the control day (i.e. baseline value), seven hours after the end of each active  
25  
26 12 challenge when the FEV<sub>1</sub> was within 10% of baseline value, and 24 hours after the last active  
27  
28 13 challenge.[25] AHR was expressed as the provocative concentration of histamine causing a  
29  
30 14 20% fall in FEV<sub>1</sub> (PC<sub>20</sub>).[22] Since March 2006, sputum cell counts were assessed at the end  
31  
32 15 of the control day and seven hours after the end of active challenges (i.e. after the  
33  
34 16 assessment of AHR and administration of an inhaled bronchodilator). Sputum was induced  
35  
36 17 through the inhalation of increasing concentrations (3%, 4%, and 5%) of hypertonic saline  
37  
38 18 and processed as previously described.[26]

39  
40  
41 19 Those subjects who did not demonstrate a  $\geq 20\%$  fall in FEV<sub>1</sub> during the first active test day  
42  
43 20 underwent a repeated challenge for a maximum of 2-3 hours on the next day. Further  
44  
45 21 challenges were proposed when there was a  $>3$ -fold decrease in the post-challenge PC<sub>20</sub>  
46  
47 22 value or a  $>3\%$  increase in sputum eosinophils as compared to the control day.[25, 26]

### 23 **Data analysis**

24  
25 24 The following information was collected from the medical charts: 1) demographic, clinical,  
26  
27 25 and occupational characteristics of the subjects; and 2) baseline functional data, histamine  
28  
29 26 PC<sub>20</sub> value on the control day and after the last active challenge, as well as the  
30  
31  
32  
33  
34  
35  
36  
37  
38  
39  
40  
41  
42  
43  
44  
45  
46  
47  
48  
49  
50  
51  
52  
53  
54  
55  
56  
57  
58  
59  
60

1  
2  
3 1 corresponding sputum cell counts when available. Changes in AHR were considered  
4  
5 2 significant when there was a >3-fold decrease in post-challenge histamine PC<sub>20</sub> compared to  
6  
7 3 baseline value.[25] An increase in sputum eosinophils of more than two percentage points  
8  
9 4 compared with the control day value was regarded as clinically relevant.[25, 27]

10  
11  
12 5 Quantitative data are presented as median and 25<sup>th</sup> and 75<sup>th</sup> interquartile range.  
13  
14 6 Comparisons between subgroups of subjects were made using the chi-squared test, Fisher  
15  
16 7 exact test, or Wilcoxon rank-sum test as appropriate. The Wilcoxon signed-rank test was  
17  
18 8 used for comparing variables before and after SIC in the same subjects. All statistical tests  
19  
20 9 were two-tailed; a p-value <0.05 was considered significant. Statistical analysis was  
21  
22 10 performed using the IBM SPSS Statistics 19.0 software (SPSS Inc, Chicago, Ill).  
23  
24  
25  
26  
27  
28  
29  
30  
31  
32  
33  
34  
35  
36  
37  
38  
39  
40  
41  
42  
43  
44  
45  
46  
47  
48  
49  
50  
51  
52  
53  
54  
55  
56  
57  
58  
59  
60

## 1 RESULTS

### 2 Baseline characteristics

3 During the reviewed period, 44 of 713 (6%) subjects were challenged with cleaning agents  
4 and/or disinfectants. The main demographic, occupational, and clinical characteristics of the  
5 subjects are presented in Table 1. A  $\geq 20\%$  decrease in FEV<sub>1</sub> was recorded during SIC in 17  
6 (39%) of the subjects, 24% showing an isolated immediate reaction, 18% an isolated late  
7 reaction, 29% dual reactions, and 30% atypical reactions. The proportion of subjects referred  
8 for possible OA due to cleaning agents among all subjects evaluated through an SIC  
9 procedure in our centre increased from 3.2% (10 of 316) during the period 1992-2001 to  
10 8.6% (34 of 397,  $p=0.003$ ) from 2002 to 2011. The vast majority of the subjects with a  
11 positive SIC (16 of 17) had been evaluated during the last decade (2002-2011).

12 The median (interquartile range) duration of exposure to cleaning agents that elicited an  
13 asthmatic reaction was 120 (32-150) minutes. The cleaning products that induced a positive  
14 FEV<sub>1</sub> response contained quaternary ammonium compounds (QAC) (mainly, benzalkonium  
15 and didecylmethylammonium chlorides) in 10 (59%) subjects, glutaraldehyde in three  
16 instances, both agents in one instance, and ethanolamines in two subjects (Table 1). No  
17 known sensitizing agent was identified in one subject who had been challenged with a  
18 cleaning product that contained sodium octylsulfate, nitrilotriacetic acid, and potassium  
19 hydroxide.

20 The subjects who developed an asthmatic response to cleaning agents and/or disinfectants  
21 did not differ from those who did not for most of the demographic and clinical characteristics.  
22 The pattern of the work-related respiratory symptoms was similar in both groups (Table 1),  
23 although wheezing at work was slightly more frequently reported by subjects with a positive  
24 SIC (82% vs. 52%,  $p=0.056$ ). The subjects with a positive SIC tended to experience a lower  
25 level of asthma control. The proportion of these subjects who required the use of an inhaled  
26 short-acting beta<sub>2</sub>-agonist at least once a day was significantly higher (41%) as compared to

1 those with a negative SIC (4%;  $p=0.002$ ), although the daily dose of inhaled corticosteroids  
2 were similar in both groups. In addition, baseline spirometry revealed more often significant  
3 airway obstruction in subjects who showed a positive SIC (29%) than in those who did not  
4 (4%,  $p=0.016$ ).

### 5 **Non-specific airway hyperresponsiveness**

6 At baseline, the subjects with a positive SIC to cleaning products showed a significantly  
7 lower median histamine  $PC_{20}$  value than those with a negative SIC ( $p=0.004$ ) (Table 2).

8 Among the 27 subjects with a negative SIC, 13 (48%) failed to demonstrate significant airway  
9 hyperresponsiveness (i.e. histamine  $PC_{20}$  value  $>16$  mg/ml) at the pre-challenge  
10 assessment. These subjects differed from the 14 subjects with a histamine  $PC_{20}$  value  $\leq 16$   
11 mg/ml only by a longer duration of work-related asthma symptoms before the SIC (47 [21-70]  
12 months vs. 19 [6-41] months,  $p=0.036$ ).

13 A post-challenge histamine  $PC_{20}$  value was available in 12 of the 17 subjects who showed a  
14 positive SIC and in 25 of 27 subjects with a negative SIC. The post-challenge  $PC_{20}$  value  
15 was not measured because the  $FEV_1$  24 hours after the end of exposure was still  $\geq 20\%$   
16 lower than the pre-challenge value in four subjects with a positive SIC or because the  
17 subjects refused to complete the test in the other instances. Positive SICs were associated  
18 with a significant decrease in the median post-challenge  $PC_{20}$  value, whereas no change was  
19 documented in subjects with a negative SIC. Five of the 12 (42%) subjects with a positive  
20 SIC demonstrated a  $>3$ -fold decrease in post-challenge  $PC_{20}$  value, while none of those with  
21 a negative SIC did so.

### 22 **Sputum cell counts**

23 Among the subjects who were investigated from 2006 onwards, a suitable sputum sample  
24 was obtained seven hours after the end of the last active challenge in 13 of 15 positive SICs  
25 and in seven of 11 negative SICs (Table 2). At baseline, the subjects with a positive SIC

1 showed a slightly higher sputum eosinophil percentage than those with a negative SIC  
 2 (p=0.046). Positive SICs were associated with a significant post-challenge increase in  
 3 sputum eosinophils, while eosinophil counts did not significantly change in negative SICs.  
 4 Eight (62%) of the 13 subjects with a positive SIC showed a >2% increase in post-challenge  
 5 eosinophils, while none of the subjects with a negative SIC did so. In subjects with a positive  
 6 SIC, there was an increase in the absolute number of sputum neutrophils after the last active  
 7 challenge while the percentage of neutrophils was not significantly different at baseline and  
 8 on the last challenge day.

9 Overall, positive SICs were associated with either a >3-fold decrease in post-challenge PC<sub>20</sub>  
 10 value in three subjects, a >2% increase in sputum eosinophils in six subjects, or both of  
 11 these outcomes in two subjects.

12 **Table 1. Demographic, occupational, and clinical characteristics of the subjects**

|                                                  | Positive SIC<br>(n=17) | Negative SIC<br>(n=27) | p-value |
|--------------------------------------------------|------------------------|------------------------|---------|
| Gender (female)                                  | 13 (76)                | 23 (85)                | 0.466   |
| Age, yr*                                         | 47 (39-49)             | 47 (35-53)             | 0.942   |
| Referral by WCB                                  | 13 (76)                | 20 (74)                | 0.858   |
| Job/industry :                                   |                        |                        |         |
| Professional cleaners:                           | 9                      | 15                     |         |
| Healthcare facilities                            | 2                      | 5                      |         |
| Various industries                               | 3                      | 4                      |         |
| Private houses                                   | 1                      | 3                      |         |
| Public buildings                                 | 2                      | 2                      |         |
| Kitchens                                         | 1                      | 1                      |         |
| Healthcare workers                               | 7                      | 9                      |         |
| Food workers                                     | 1                      | 2                      |         |
| Pharmaceutical workers                           | 0                      | 1                      |         |
| Exposure to respiratory sensitizers:             | 16 (94)                | 16 (59)                | 0.033   |
| QAC                                              | 10                     | 6                      |         |
| QAC and glutaraldehyde                           | 1                      | 3                      |         |
| Glutaraldehyde                                   | 3                      | 7                      |         |
| Ethanolamines                                    | 2                      | 0                      |         |
| No identified sensitizer                         | 1                      | 11                     |         |
| Current and ex-smokers                           | 6 (35)                 | 8 (30)                 | 0.694   |
| Atopy †                                          | 7 (41)                 | 13 (48)                | 0.651   |
| Asthma pre-existing to exposure                  | 2 (12)                 | 2 (7)                  | 0.624   |
| Duration of exposure before onset of asthma, mo* | 12 (5-153)             | 53 (31-165)            | 0.114   |
| Duration of asthma before SIC, mo*               | 25 (7-59)              | 25 (10-55)             | 0.980   |
| Delay since last work exposure, mo*              | 10 (0.3-16)            | 8 (0.1-24)             | 0.808   |

|                                                      |             |              |       |
|------------------------------------------------------|-------------|--------------|-------|
| Work-related respiratory symptoms:                   |             |              |       |
| Wheezing                                             | 14 (82)     | 14 (52)      | 0.056 |
| Breathlessness                                       | 14 (82)     | 20 (74)      | 0.716 |
| Cough                                                | 11 (65)     | 21 (78)      | 0.343 |
| Chest tightness                                      | 11 (65)     | 18 (67)      | 0.893 |
| Sputum                                               | 4 (24)      | 8 (30)       | 0.740 |
| Work-related rhinitis                                | 8 (47)      | 16 (59)      | 0.429 |
| Work-related dermatitis:                             | 5 (29)      | 5 (19)       | 0.401 |
| Inhaled corticosteroid:                              |             |              |       |
| No. with Inhaled corticosteroid                      | 13 (76)     | 15 (56)      | 0.160 |
| Low dose ‡                                           | 3 (18)      | 5 (19)       |       |
| Medium dose ‡                                        | 5 (29)      | 5 (19)       | 0.494 |
| High dose ‡                                          | 5 (29)      | 5 (19)       |       |
| Short-acting beta <sub>2</sub> -agonist ≥ once a day | 7 (41)      | 1 (4)        | 0.002 |
| Baseline FEV <sub>1</sub> , % predicted*             | 92 (73-101) | 100 (88-109) | 0.049 |
| Baseline FEV <sub>1</sub> /FVC, %*                   | 71 (63-77)  | 80 (73-83)   | 0.002 |
| Baseline airway obstruction ¥                        | 5 (29)      | 1 (4)        | 0.016 |

Legend: Data are presented as n (% of available data) unless otherwise specified. FEV<sub>1</sub>: forced expiratory volume in one-second; FVC: forced vital capacity; PC<sub>20</sub>: provocative concentration of histamine causing a 20% fall in FEV<sub>1</sub>; QAC: quaternary ammonium compound; SIC: specific inhalation challenge; WCB: workers' compensation board.

\*: Median value with 25<sup>th</sup>-75<sup>th</sup> interquartile range in parentheses;

‡: Atopy defined by a positive skin-prick test to at least one common inhalant allergen;

‡: Low dose: equal or less than 500 µg beclomethasone dipropionate equivalent per day; medium dose: more than 500 µg but equal or less than 1000 µg per day; and high dose: more than 1000 µg per day.

¥: Airway obstruction defined by an FEV<sub>1</sub> <80% predicted value and an FEV<sub>1</sub>/FVC ratio <70%.

1  
2  
3  
4  
5  
6  
7  
8  
9  
10  
11  
12  
13  
14  
15  
16  
17  
18  
19  
20  
21  
22  
23  
24  
25  
26  
27  
28  
29  
30  
31  
32  
33  
34  
35  
36  
37  
38  
39  
40  
41  
42  
43  
44  
45  
46  
47  
48  
49  
50  
51  
52  
53  
54  
55  
56  
57  
58  
59  
60

1  
2  
3

**Table 2. Changes in non-specific airway responsiveness and sputum cells during inhalation challenges with cleaning agents**

|                                        | Positive SIC     |                  |         | Negative SIC     |                   |         |
|----------------------------------------|------------------|------------------|---------|------------------|-------------------|---------|
|                                        | Baseline         | Post-challenge   | p-value | Baseline         | Post-challenge    | p-value |
| AHR to histamine:                      | (n=17)           | (n=12)           |         | (n=27)           | (n=25)            |         |
| PC <sub>20</sub> , mg/ml               | 1.4 (0.2-4.22)   | 0.5 (0.4-3.0)†   | 0.019   | 13.0 (1.4-32.0)  | 16.9 (2.6-32.0)   | 0.267   |
| PC <sub>20</sub> >16 mg/ml*            | 2 (12)           | 0                |         | 13 (48)          | 13 (52)           |         |
| >3-fold decrease in PC <sub>20</sub> * |                  | 5 (42)           |         |                  | 0                 |         |
| Sputum cell counts:‡                   | (n=13)           | (n=13)           |         | (n=7)            | (n=7)             |         |
| Total cell count, 10 <sup>6</sup> /ml  | 0.54 (0.34-0.97) | 1.15 (0.53-2.17) | 0.041   | 0.34 (0.26-1.89) | 0.65 (0.38-1.81)  | 0.735   |
| Eosinophils, 10 <sup>6</sup> cells/ml  | 0.02 (0.01-0.04) | 0.12 (0.02-0.39) | 0.006   | 0 (0-0.01)       | 0.01 (0.01-0.010) | 0.345   |
| Eosinophils, %                         | 1.8 (0.8-7.2)    | 10.0 (4.1-15.9)  | 0.009   | 0.2 (0-2.5)      | 0.8 (0.2-1.5)     | 0.786   |
| Increase in eosinophils >2%*           |                  | 8 (62)           |         |                  | 0                 |         |
| Neutrophils, 10 <sup>6</sup> cells/ml  | 0.40 (0.17-0.70) | 0.71 (0.38-1.62) | 0.009   | 0.19 (0.16-1.70) | 0.34 (0.25-1.52)  | 0.866   |
| Neutrophils, %                         | 57.3 (42.4-72.5) | 69.5 (56.9-83.0) | 0.152   | 60.3 (55.7-83.0) | 70.3 (52.5-84.0)  | 0.866   |

4 Legend: Data are presented as median value with 25<sup>th</sup>-75<sup>th</sup> interquartile range in parentheses unless  
5 otherwise specified. AHR: airway hyperresponsiveness; PC<sub>20</sub>: provocative concentration of histamine  
6 causing a 20% fall in FEV<sub>1</sub>; SIC: specific inhalation challenge.

7 \*: Data expressed as n (% of available data);

8 †: Histamine PC<sub>20</sub> was measured at seven hours after the end of exposure in six subjects and 24  
9 hours post-exposure in six subjects with positive SIC;

10 ‡: Data available in subjects who performed an SIC from 2006 onwards.  
11  
12



## 1 DISCUSSION

2 This study showed that challenge exposure to the cleaning agents and/or disinfectants used  
3 at work induced an asthmatic reaction in 39% of the subjects who experienced asthma  
4 symptoms upon exposure to these products. In addition, the results of the SICs provided  
5 evidence supporting a specific hypersensitivity mechanism rather than a nonspecific  
6 bronchoconstriction due to an irritant effect. Indeed, eleven (65%) of the 17 positive SICs  
7 induced by cleaning agents were associated with a significant increase in post-challenge  
8 AHR, an increase in sputum eosinophils, or both of these outcomes. Noticeably, among the  
9 subjects who developed a positive bronchial response to QACs, a post-challenge increase in  
10 sputum eosinophils and/or in the level of AHR was documented in nine of ten instances.

11 To the best of our knowledge, this is the first study reporting the changes in lung function  
12 parameters and markers of airway inflammation in subjects challenged with the cleaning  
13 materials suspected of causing work-related asthma symptoms. Available evidence indicates  
14 that cleaning materials can both exacerbate asthma (i.e. work-exacerbated asthma) and  
15 induce the development of asthma (i.e. occupational asthma) through either immunological  
16 or irritant mechanisms.[12, 16, 19, 28] Medina-Ramon et al. investigated the daily changes in  
17 peak expiratory flow (PEF) in 43 female domestic cleaners with a recent history of asthma  
18 and/or chronic bronchitis.[20] There was no significant association between the changes in  
19 PEF and cleaning exposures, with the exception of a decrease in PEF at night that was  
20 related to the use of ammonia. Nevertheless, analysis of PEF data using the Occupational  
21 Asthma System (OASYS) program identified a work-related pattern in 30% of the subjects,  
22 but the specific exposures associated with these changes were not described. By contrast,  
23 Bernstein et al. reported an increase in lower respiratory tract symptoms during cleaning  
24 activities in asthmatic homemakers compared with non-asthmatics in the absence of  
25 significant changes in PEF.[21] Our findings in subjects with a positive SIC are consistent  
26 with previous studies which reported that an increase in AHR and sputum eosinophils occurs  
27 specifically – though inconstantly – in sensitized individuals who develop asthmatic reactions

1 induced by common inhalant allergens as well as high-molecular-weight and low-molecular-  
2 weight occupational agents.[29] Only one subject developed a  $\geq 20\%$  fall in FEV<sub>1</sub> on  
3 exposure to a degreasing spray that apparently did not contain a known sensitizing agent.  
4 This subject who reported pre-existing asthma, also failed to demonstrate a post-challenge  
5 increase in AHR or sputum eosinophils, suggesting that the bronchial response resulted from  
6 an irritant effect consistent with the concept of “work-exacerbated asthma”. [30]

7 Noticeably, 13 subjects with a negative SIC showed AHR to histamine neither at baseline nor  
8 after challenge exposure to the cleaning agents (Table 2), although nine of them were  
9 treated with an inhaled corticosteroid. These findings are consistent with those reported by  
10 Chiry et al. who found that a high proportion (57%) of subjects referred to tertiary centres for  
11 work-related asthma symptoms failed to demonstrate any functional evidence of asthma,  
12 although they experienced respiratory symptoms that were similar to those diagnosed as  
13 having OA or work-exacerbated asthma, except for a lower prevalence of wheezing.[31] A  
14 recent population-based questionnaire survey of health care workers exposed to cleaning  
15 materials also found that a high proportion (64%) of the subjects who experienced work-  
16 related asthma symptoms had not been given a diagnosis of asthma.[12]

17 There is little information on the specific agents involved in the various phenotypes of asthma  
18 related to cleaning exposure. Most epidemiological studies have linked asthma with  
19 exposure to irritant cleaning materials, mainly bleach,[9, 11, 12, 17, 28] ammonia,[9, 11, 12,  
20 20, 28] and cleaning/degreasing sprays.[9, 11, 12, 20] On the other hand, occasional case  
21 reports have described OA presumably due to specific sensitization to disinfectants, such as  
22 chloramine-T, glutaraldehyde, QACs, and isothiazolinone, surfactants, ethanolamines used  
23 in wax-removing compounds, and detergent enzymes.[1, 2] Among the cases of asthma  
24 related to cleaning products identified by the US Sentinel Event Notification Systems for  
25 Occupational Risks (SENSOR), 62% were considered as “OA with a latency period”, but only  
26 14% of these cases were related to an identified respiratory sensitizer.[16] A recent Finnish  
27 report described 20 cases of OA diagnosed in professional cleaning workers using SIC

1 during the period 1994-2004.[32] The majority (70%) of these cases were caused by moulds  
2 and non-cleaning chemicals (e.g. isocyanates) that were present at the workplace, whereas  
3 only six cases of OA were attributed to cleaning agents, including ethanolamines and  
4 chloramine-T. Our study focusing on the role of cleaning products and/or disinfectants  
5 indicates that QACs are the most frequent agent causing OA in workers exposed to such  
6 materials in various occupations. Very few cases of OA due to QACs have been reported in  
7 the literature,[33, 34] although these compounds are widely used in cleaning products.[14,  
8 15] QACs are non-volatile, but it is likely that inhalation exposure may occur during spray  
9 application of the products.[14, 15] The immunological mechanisms involved in the  
10 development of specific airway hypersensitivity to QACs is unknown as it is the case for most  
11 low-molecular-weight occupational agents.[29]

12 The major limitation of this study results from the lack of quantitative exposure assessment  
13 during the SICs. The agents that induced the observed asthmatic reactions could not be  
14 formally identified since the subjects were challenged with the commercial products they  
15 used at work, which most often contained a mixture of various potentially sensitizing and  
16 irritant compounds. The causal agents could only be inferred from their known asthmagenic  
17 potential. The asthma hazard index of QACs (0.81 to 0.95), glutaraldehyde (0.82), and  
18 ethanolamines (0.64 to 0.86) derived from a quantitative structure activity relationship model  
19 is above the cut-off value of 0.5, which predicts the potential for inducing OA with a sensitivity  
20 of 86% and a specificity of 99% (Seed MJ, personal communication;  
21 <http://www.coeh.man.ac.uk/research/asthma/>; last accessed 28 January 2012) [35].

22 The subjects described in this report may not accurately represent the whole population of  
23 workers with asthma related to cleaning activities. The data were derived from the single  
24 specialized centre of the French-speaking part of Belgium (~1.7 million active workers) where  
25 all SICs were performed during the period from 1992 to 2011. However, the subjects  
26 evaluated in this study may represent only a subset of cleaning workers whom symptoms are  
27 severe enough for seeking specialized medical advice or claim compensation. It is likely that

1 domestic cleaners were largely underrepresented in our series since most private home  
2 cleaners are employed in the informal sector and are not eligible for compensation. Failure to  
3 refer workers with possible cleaning-related asthma to our tertiary centre may also result  
4 from under-recognition of the condition by health care providers and reluctance by workers to  
5 seek medical advice for work-related symptoms because of concerns about adverse  
6 professional and financial consequences, as already outlined for work-related asthma in  
7 general.[36, 37] However, facilities for performing objective assessment of work-related  
8 asthma are easily available in Belgium, SIC procedures are paid by the WCB, and those  
9 workers who qualify for compensation are entitled to receive several types of financial  
10 awards, which are better than those obtained from the national health insurance. Noteworthy,  
11 the study focused on individuals who experienced work-related asthma symptoms that were  
12 directly related to cleaning products and/or disinfectants; those with symptoms related to  
13 workplace agents other than cleaning products were not included in this study.

14 This study did not allow for estimating the incidence of OA among workers exposed to  
15 cleaning/disinfecting materials. Indeed, the number of workers exposed to these agents in  
16 the French-speaking part of Belgium could not be accurately determined since the subjects  
17 with cleaning-related asthma were employed in a wide spectrum of occupations and  
18 industrial sectors. Despite their inherent limitations, the data yield some suggestion as to a  
19 recent increase in OA caused by cleaning/disinfecting materials, since most cases in our  
20 series were evaluated during the last ten years of the study period.

## 21 CONCLUSION

22 This study based on SICs indicates that a substantial proportion of subjects who experience  
23 asthma symptoms related to cleaning materials actually suffer from sensitizer-induced OA,  
24 predominantly caused by QACs. The findings of this study may help to improve the  
25 diagnosis, management and prevention of cleaning-related asthma, although further  
26 investigation is required to identify the underlying pathophysiological mechanisms.

1  
2  
3 1 **Acknowledgements:**  
4

5  
6 2 The authors are grateful to Maria Roccaro-Luczak, Michael Duchene, and Stéphane  
7  
8 3 François from the *Fonds des Maladies Professionnelles*, Brussels, Belgium who performed  
9  
10 4 most of the job exposure assessments. They also thank James Hatch for reviewing the  
11  
12 5 manuscript.  
13

14  
15 6 **Contributorship statement:**  
16

17  
18 7 OV, JT, JCR, and FH: Conception of the study, interpretation of data, and reviewing of the  
19  
20 8 manuscript; VD, GE, and JJ: Data collection, analysis of data, and reviewing of the  
21  
22 9 manuscript. OV supervised specific inhalation challenges, drafted the initial version of the  
23  
24 10 manuscript, and acts as guarantor of the final content of the manuscript.  
25

26  
27 11 **Data sharing statement:**  
28

29  
30 12 Extra data is available by emailing [olivier.vandenplas@uclouvain.be](mailto:olivier.vandenplas@uclouvain.be)  
31  
32

33 13 **Funding:**  
34

35  
36 14 This work was supported by a grant from the *Actions de Recherche Concertées de la*  
37  
38 15 *Communauté Française de Belgique*.  
39

40  
41 16 **Competing interests:** None to declare.  
42  
43  
44 17  
45  
46  
47  
48  
49  
50  
51  
52  
53  
54  
55  
56  
57  
58  
59  
60

1  
2  
3 **1 REFERENCES**

- 4  
5 2 1. Zock JP, Vizcaya D, Le Moual N. Update on asthma and cleaners. *Curr Opin Allergy*  
6  
7 3 *Clin Immunol* 2010;10:114-20.
- 8  
9 4 2. Quirce S, Barranco P. Cleaning agents and asthma. *J Investig Allergol Clin Immunol*  
10  
11 5 2010;20:542-50; quiz 2p following 50.
- 12  
13 6 3. Zock JP, Kogevinas M, Sunyer J, et al. Asthma risk, cleaning activities and use of  
14  
15 7 specific cleaning products among Spanish indoor cleaners. *Scand J Work Environ*  
16  
17 8 *Health* 2001;27:76-81.
- 18  
19 9 4. Medina-Ramon M, Zock JP, Kogevinas M, et al. Asthma symptoms in women employed  
20  
21 10 in domestic cleaning: a community based study. *Thorax* 2003;58:950-4.
- 22  
23 11 5. Arif AA, Delclos GL, Whitehead LW, et al. Occupational exposures associated with work-  
24  
25 12 related asthma and work-related wheezing among U.S. workers. *Am J Ind Med*  
26  
27 13 2003;44:368-76.
- 28  
29 14 6. Karjalainen A, Martikainen R, Karjalainen J, et al. Excess incidence of asthma among  
30  
31 15 Finnish cleaners employed in different industries. *Eur Respir J* 2002;19:90-5.
- 32  
33 16 7. Kogevinas M, Zock JP, Jarvis D, et al. Exposure to substances in the workplace and  
34  
35 17 new-onset asthma: an international prospective population-based study (ECRHS-II).  
36  
37 18 *Lancet* 2007;370:336-41.
- 38  
39 19 8. Ghosh RE, Cullinan P, Fishwick D, et al. Asthma and occupation in the 1958 birth  
40  
41 20 cohort. *Thorax* 2013;68:365-71.
- 42  
43 21 9. Mirabelli MC, Zock JP, Plana E, et al. Occupational risk factors for asthma among  
44  
45 22 nurses and related healthcare professionals in an international study. *Occup Environ*  
46  
47 23 *Med* 2007;64:474-9.
- 48  
49 24 10. Delclos GL, Gimeno D, Arif AA, et al. Occupational risk factors and asthma among  
50  
51 25 health care professionals. *Am J Respir Crit Care Med* 2007;175:667-75.
- 52  
53  
54  
55  
56  
57  
58  
59  
60

- 1 11. Vizcaya D, Mirabelli MC, Anto JM, et al. A workforce-based study of occupational  
2 exposures and asthma symptoms in cleaning workers. *Occup Environ Med*  
3 2011;68:914-9.
- 4 12. Arif AA, Delclos GL. Association between cleaning-related chemicals and work-related  
5 asthma and asthma symptoms among healthcare professionals. *Occup Environ Med*  
6 2012;69:35-40.
- 7 13. Obadia M, Liss GM, Lou W, et al. Relationships between asthma and work exposures  
8 among non-domestic cleaners in Ontario. *Am J Ind Med* 2009;52:716-23.
- 9 14. Wolkoff P, Schneider T, Kildeso J, et al. Risk in cleaning: chemical and physical  
10 exposure. *Sci Total Environ* 1998;215:135-56.
- 11 15. Bello A, Quinn MM, Perry MJ, et al. Characterization of occupational exposures to  
12 cleaning products used for common cleaning tasks--a pilot study of hospital cleaners.  
13 *Environ Health* 2009;8:11.
- 14 16. Rosenman KD, Reilly MJ, Schill DP, et al. Cleaning products and work-related asthma. *J*  
15 *Occup Environ Med* 2003;45:556-63.
- 16 17. Medina-Ramon M, Zock JP, Kogevinas M, et al. Asthma, chronic bronchitis, and  
17 exposure to irritant agents in occupational domestic cleaning: a nested case-control  
18 study. *Occup Environ Med* 2005;62:598-606.
- 19 18. Orriols R, Costa R, Albanell M, et al. Reported occupational respiratory diseases in  
20 Catalonia. *Occup Environ Med* 2006;63:255-60.
- 21 19. Vizcaya D, Mirabelli MC, Orriols R, et al. Functional and biological characteristics of  
22 asthma in cleaning workers. *Respir Med* 2013;107:673-83.
- 23 20. Medina-Ramon M, Zock JP, Kogevinas M, et al. Short-term respiratory effects of  
24 cleaning exposures in female domestic cleaners. *Eur Respir J* 2006;27:1196-203.
- 25 21. Bernstein JA, Brandt D, Rezvani M, et al. Evaluation of cleaning activities on respiratory  
26 symptoms in asthmatic female homemakers. *Ann Allergy Asthma Immunol* 2009;102:41-  
27 6.

- 1  
2  
3 1 22. Sterk PJ, Fabbri LM, Quanjer PH, et al. Airway responsiveness. Standardized challenge  
4 testing with pharmacological, physical and sensitizing stimuli in adults. Report Working  
5 2 Party Standardization of Lung Function Tests, European Community for Steel and Coal.  
6 3 Official Statement of the European Respiratory Society. *Eur Respir J Suppl* 1993;16:53-  
7 4 83.  
8 5  
9 6 23. Vandenas O, Malo JL. Inhalation challenges with agents causing occupational asthma.  
10 7 *Eur Respir J* 1997;10:2612-29.  
11 8  
12 9 24. Pepys J, Hutchcroft BJ. Bronchial provocation tests in etiologic diagnosis and analysis of  
13 10 asthma. *Am Rev Respir Dis* 1975;112:829-59.  
14 11  
15 12 25. Vandenas O, Delwiche JP, Jamart J, et al. Increase in non-specific bronchial  
16 13 hyperresponsiveness as an early marker of bronchial response to occupational agents  
17 14 during specific inhalation challenges. *Thorax* 1996;51:472-8.  
18 15  
19 16 26. Vandenas O, D'Alpaos V, Heymans J, et al. Sputum eosinophilia: an early marker of  
20 17 bronchial response to occupational agents. *Allergy* 2009;64:754-61.  
21 18  
22 19 27. Girard F, Chaboillez S, Cartier A, et al. An effective strategy for diagnosing occupational  
23 20 asthma: use of induced sputum. *Am J Respir Crit Care Med* 2004;170:845-50.  
24 21  
25 22 28. de Fatima Macaira E, Algranti E, Medina Coeli Mendonca E, et al. Rhinitis and asthma  
26 23 symptoms in non-domestic cleaners from the Sao Paulo metropolitan area, Brazil.  
27 24 *Occup Environ Med* 2007;64:446-53.  
28 25  
29 26 29. Maestrelli P, Boschetto P, Fabbri LM, et al. Mechanisms of occupational asthma. *J*  
30 27 *Allergy Clin Immunol* 2009;123:531-42; quiz 43-4.  
31 28  
32 29 30. Nicholson PJ, Cullinan P, Taylor AJ, et al. Evidence based guidelines for the prevention,  
33 30 identification, and management of occupational asthma. *Occup Environ Med*  
34 31 2005;62:290-9.  
35 32  
36 33 31. Chiry S, Boulet LP, Lepage J, et al. Frequency of work-related respiratory symptoms in  
37 34 workers without asthma. *Am J Ind Med* 2009;52:447-54.  
38 35  
39 36 32. Makela R, Kauppi P, Suuronen K, et al. Occupational asthma in professional cleaning  
40 37 work: a clinical study. *Occup Med (Lond)* 2011;61:121-6.  
41 38  
42 39  
43 40  
44 41  
45 42  
46 43  
47 44  
48 45  
49 46  
50 47  
51 48  
52 49  
53 50  
54 51  
55 52  
56 53  
57 54  
58 55  
59 56  
60 57



- 1  
2  
3 1 33. Burge PS, Richardson MN. Occupational asthma due to indirect exposure to lauryl  
4  
5 2 dimethyl benzyl ammonium chloride used in a floor cleaner. *Thorax* 1994;49:842-3.  
6  
7 3 34. Purohit A, Kopferschmitt-Kubler MC, Moreau C, et al. Quaternary ammonium  
8  
9 4 compounds and occupational asthma. *Int Arch Occup Environ Health* 2000;73:423-7.  
10  
11 5 35. Seed M, Agius R. Further validation of computer-based prediction of chemical asthma  
12  
13 6 hazard. *Occup Med (Lond)* 2010;60:115-20.  
14  
15 7 36. Fishwick D, Bradshaw L, Davies J, et al. Are we failing workers with symptoms  
16  
17 8 suggestive of occupational asthma? *Prim Care Respir J* 2007;16:304-10.  
18  
19 9 37. Santos MS, Jung H, Peyrovi J, et al. Occupational asthma and work-exacerbated  
20  
21 10 asthma: factors associated with time to diagnostic steps. *Chest* 2007;131:1768-75.  
22  
23 11  
24  
25 12  
26  
27  
28  
29  
30  
31  
32  
33  
34  
35  
36  
37  
38  
39  
40  
41  
42  
43  
44  
45  
46  
47  
48  
49  
50  
51  
52  
53  
54  
55  
56  
57  
58  
59  
60
